# Supplementary material for: Molecular Therapy for Degenerative Disc Disease: Clues from Secretome Analysis of the Notochordal Cell-Rich Nucleus Pulposus
Source: PubMed Central journal article supplement (PMC5372366; doi:10.1038/srep45623), 2017-03-30
Supplement: srep45623-s1.pdf [file srep45623-s1.pdf]

**Title: Molecular Therapy for Degenerative Disc Disease: Clues from Secretome Analysis of the Notochordal Cell-Rich Nucleus Pulposus**

**Authors:** Ajay Matta<sup>1</sup>, M. Zia Karim<sup>1</sup>, David E. Isenman<sup>2</sup> and W. Mark Erwin<sup>1,3\*</sup>

**Affiliations:**

<sup>1</sup>Krembil Research Institute, Toronto Western Hospital, Toronto, Ontario, Canada.

<sup>2</sup>Department of Biochemistry, Faculty of Medicine, University of Toronto, Toronto, Ontario, Canada.

<sup>3</sup>Department of Surgery, University of Toronto, Toronto, Ontario, Canada.

**Corresponding Author:** \*W. Mark Erwin DC, PhD, Krembil Research Institute, Toronto Western Hospital, Toronto, ON, Canada.

Email: [mark.erwin@utoronto.ca](mailto:mark.erwin@utoronto.ca); Tel: 416-603-5800 ext 3308

## **SUPPLEMENTARY DATA**

### **MATERIALS AND METHODS**

**Antibodies and other reagents** - Human recombinant interleukin-1 $\beta$  (IL-1 $\beta$ ), tumor necrosis factor-alpha (TNF $\alpha$ ), connective tissue growth factor (CTGF), Wnt-inducible soluble protein 2 (WISP2) and transforming growth factor beta 1 (TGF $\beta$ 1) proteins were purchased from Peprotech Inc. (Quebec, Canada). We obtained rabbit polyclonal antibodies for Collagen 2 (ab34712), MMP-13 (ab39012), Cox2 (ab15191), Oct4 (ab18976), Nanog (ab106465), CTGF (ab6995), rabbit monoclonal for MMP-3 (ab52915) and mouse monoclonal antibodies for Galectin 3 (ab2785) and  $\beta$ -actin (ab6276) were purchased from Abcam Inc. (CA, USA). Goat polyclonal Brachyury antibody (sc-17743) and rabbit polyclonal antibodies for Aggrecan (sc-25674), TIMP-1 (sc-5538), ADAMTS-4 (sc-25582), TNF $\alpha$  (sc-8301), TGF $\beta$ 1 (sc-146) and mouse monoclonal WISP2 (sc-514070) were obtained from Santa Cruz Biotechnology Inc. (CA, USA).

**RNA isolation and Real Time PCR**- Total RNA was isolated from human degenerative disc NP cells (H1 / H2 / H3) treated with IL-1 $\beta$  (10 ng/mL), TNF $\alpha$  (50 ng/mL), CTGF (100ng/mL), TGF $\beta$ 1 (10 ng/mL) or a combination of CTGF (100 ng/mL) and TGF $\beta$ 1 (10 ng/mL) using RNAeasy extraction kit (Cat#74134, Qiagen) and quantified using a Nanodrop spectrophotometer. Total RNA (~ 400ng) was reverse-transcribed using RT<sup>2</sup> First Strand Kit (Cat#330401, Qiagen) following the manufacturer's instructions for preparing cDNA. Effect of treatment on ECM genes including collagen 2, HAPLN1, versican, thrombospondin 1 (Thbs1), MMP-13 and Cox2 was evaluated using real time PCR performed on ABI 7900HT 384-well Fast block machine.

**Cell viability and cell proliferation assays** - Nucleus pulposus cells (rat, bovine and human) in passage (P2), were plated in 96-well flat bottom plates in order to evaluate the effect of treatment with growth factors in cell viability and proliferation assays. Rat NP cells (passage, P2) were treated with CTGF, WISP-2 and TGF $\beta$ 1 in a dose (1 ng/mL – 100 ng/mL) and time dependent manner (24 hrs – 96 hrs) to determine the optimum dose and time for the assessment of these growth factors on viability. Cell viability was determined using 3-(4,5-dimethylthiazol-2-yl)-2,5-diphenyltetrazolium bromide (MTT, Sigma-Aldrich, USA) as described earlier<sup>49</sup>. We used a BrdU - ELISA (colorimetric) assay (Cat# ab126556, Abcam) for determining the effect of treatment with CTGF (100 ng/mL) or TGF $\beta$ 1 (10 ng/mL) on human and rat NP cells (healthy / injured) following the manufacturer's instructions. Briefly, NP cells were treated with CTGF (100 ng/mL) or TGF $\beta$ 1 (10 ng/mL) alone or in combination for 48 hrs following addition of BrdU reagent O/N in each well. Incorporated BrdU in DNA of proliferating cells was determined using anti-BrdU antibody and quantified by ELISA as per the manufacturer's instructions.

**Apoptosis assays** - Inflammation induced apoptosis in NP cells (rat and human) was determined using Caspase 3/7 and Caspase 9 specific Lumi-Glo assays (Promega, Madison). Briefly, NP cells were plated and treated with either IL-1 $\beta$  (10 ng/mL) alone or in combination with TNF $\alpha$  (50 ng/mL) only or in presence of CTGF (100 ng/mL) and TGF $\beta$ 1 (10 ng/mL) for 48 hrs, followed by addition of specific reagents for Caspase 3/7 and Caspase 9 as per the manufacturer's instructions. Cells were incubated for another 4 hrs at 37<sup>0</sup>C, and plates were read in a multi-well luminescence plate reader.

## RESULTS

**Histological analysis** - Histology of the degenerative disc NPs obtained from human and bovine was compared to healthy NPs obtained from NCD canine and Wistar rat IVDs. Both human and bovine degenerative IVDs showed fibrocartilaginous matrix with strong Safranin-O staining in comparison to healthy, highly cellular NC - rich NP (>90%) with faint Safranin-O staining in NCD – canines and Wistar rat (Supplementary Fig. 2A). Immunohistochemical analysis revealed no detectable expression of Brachyury (NC-specific marker) or Oct4 (stem cell marker) in human and bovine degenerative disc NPs (Supplementary Fig.1A). In contrast, strong nuclear expression of brachyury and Oct4 was observed in healthy, NCD canine and Wistar rat discs demonstrating the NC- and stem cell-rich NP (Supplementary Fig. 2A). However, negative control tissue sections showed no immunostaining demonstrating the specificity of the antibodies (Supplementary Fig. 2B).

## FIGURE LEGENDS

**Supplementary Fig. 1.** (A) Histological changes in rat disc NP in a time dependent manner (healthy – 10 weeks p.i.) with hematoxylin and eosin (H&E) staining showing loss of NCs and Safranin-O (Saf-O) staining showing development of fibrocartilagenous matrix (Scale bar 50 $\mu$ ). Panel (B) represents histograms showing fold changes in protein expression of IL1 $\beta$ , TNF $\alpha$ , Cox2, MMP-3, MMP-13, TIMP1 and ADAMTS-4. Panel (C) represents histograms showing fold changes in protein expression of Brachyury, Galectin3, Oct4 and Nanog. Each bar in the histogram represents mean  $\pm$  S.D. of 3 independent experiments. \*\*\*p<0.05; \*p-values are w.r.t No treatment controls; \*\*p-values are w.r.t 10 weeks p.i.

**Supplementary Fig. 2.** Panel (A) Safranin O staining and immunohistochemical analysis of brachyury and Oct4 proteins in paraffin embedded sections of nucleus pulposus obtained from human degenerative disc, bovine degenerative disc, non-chondrodystrophic canine and healthy rat discs (Scale bar 10 $\mu$ ). Arrows represent CLC, chondrocyte like cells and NC, notochordal cells. Panel (B) shows representative negative controls showing no immunostaining in tissue sections (rat healthy or mongrel IVD-NP), wherein specific rabbit or goat polyclonal antibodies were replaced by isotype controls (Scale bar 50 $\mu$ ). Panel (C) represents histograms showing fold changes in protein expression of Collagen2, Oct4 and Nanog in rat IVD-NP injected with PBS, control media or NCCM. Each bar in the histogram represents mean  $\pm$  S.D. of 3 independent experiments. \*\*\*p<0.05; \*p-values are w.r.t No treatment controls; \*\*p-values are w.r.t 10 weeks p.i.

**Supplementary Fig. 3.** Evaluation of bioactivity in protein containing fractions (PF) collected after size exclusion chromatography. Histograms showing (A) cell viability, (B) caspase-3/7

activity in bovine NP cells treated with NCCM, the cytotoxic drug, etoposide (300  $\mu$ M, used as a positive control) in presence of NCCM or control medium (serum, phenol red and protein free Hybridoma Media). Each bar represents mean  $\pm$  S.D. of 2 independent experiments done in triplicates (n=6). (C) Histograms showing caspase-3/7 activity in bovine NP cells treated with etoposide in control medium (serum free, phenol red free Hybridoma Media) or in presence of protein containing fractions (PFs). Each bar represents mean  $\pm$  S.D. of 2 independent experiments done in triplicates (n=6). For these experiments, protein containing fractions (PFs) were mixed (1:1) with control medium (serum free, phenol red free Hybridoma Media) and compared to no treatment controls (i.e. elution buffer + control medium (1:1)).

**Supplementary Fig. 4.** Ingenuity Pathway Analysis showing (A) Canonical signaling pathways identified. (B) Radial model showing CTGF as important hub proteins regulating / interacting with several other growth factors and ECM proteins. (C) Protein network involved in cartilage development and degradation; (D) and (E) Cell signaling involved in axonal growth. Proteins highlighted were identified in the secretome analysis.

**Supplementary Fig. 5.** Dose (5 ng/mL – 100 ng/mL) and time dependent (24 hrs - 96 hrs) effects of (A) CTGF, (B) WISP2 and (C) TGF $\beta$ 1 treatment alone or (D) combination of CTGF with WISP2, and TGF $\beta$ 1 on cell viability determined using MTT assays in NP cells obtained from healthy rat IVDs. Each bar represents mean  $\pm$  S.D. of 3 independent experiments done in quadruplicates (n=12).

**Supplementary Fig. 6.** Effect of CTGF, WISP2 and TGF $\beta$ 1 treatment alone or in combination on cell viability as determined using MTT assays in NP cells obtained from (A) rat (healthy / injured) disc, \*p $\leq$ 0.02, (B) bovine degenerative disc, \*p<0.01 and (C) human (H1, H2)

degenerative NP cells in 48 hrs (\*p<0.005,\*\*p=0.02). Each bar represents mean  $\pm$  S.D. of 3 independent experiments done in triplicates (n=9).

**Supplementary Fig. 7.** Panel (A) shows a representative Western blot panel verifying increased collagen 2 expression in human degenerative disc NP cells(#H2) on treatment with CTGF and TGF $\beta$ 1. Panel (B) represents histograms showing fold changes in protein expression of Collagen2 in human NP cells treated with CTGF, TGF $\beta$ 1 alone or in combination as compared to no treatment controls (NTC).

**Supplementary Fig. 8.** Panel (A) represents histograms showing fold changes in protein expression of MMP-3, MMP-13 and Cox2 on treatment with IL1 $\beta$  alone or in presence of CTGF, WISP2 or TGF $\beta$ 1. Panel (B) represents histograms showing fold changes in protein expression of MMP-3, MMP-13 and Cox2 on treatment with IL1 $\beta$  and TNF $\alpha$  alone or in presence of CTGF, WISP2 or TGF $\beta$ 1. Each bar in the histogram represents mean  $\pm$  S.D. of 5 independent experiments. \*\*\*p<0.05; \*p-values are w.r.t No treatment controls (NTC); \*\*p-values are w.r.t IL1 $\beta$  or a combination of IL1 $\beta$  and TNF $\alpha$ .

**Supplementary Fig. 9.** Panel represents histograms showing fold change in protein expression of MMP-13, Cox2, Brachyury and Oct4 in rat IVD-NP injected with PBS, CTGF, TGF $\beta$ 1 alone or in combination. \*\*p<0.05; p-values are w.r.t PBS controls. Each bar in the histogram represents mean  $\pm$  S.D. of 3 independent experiments.

# Supplementary Fig. 1.

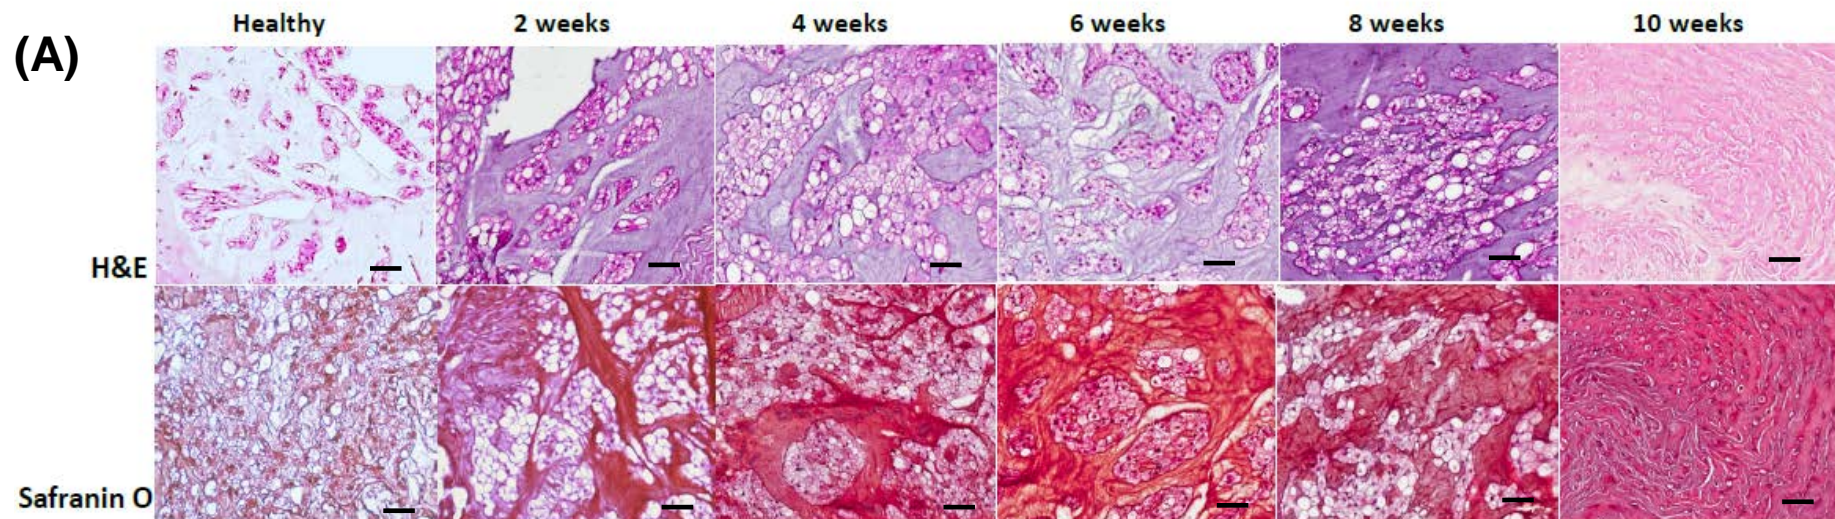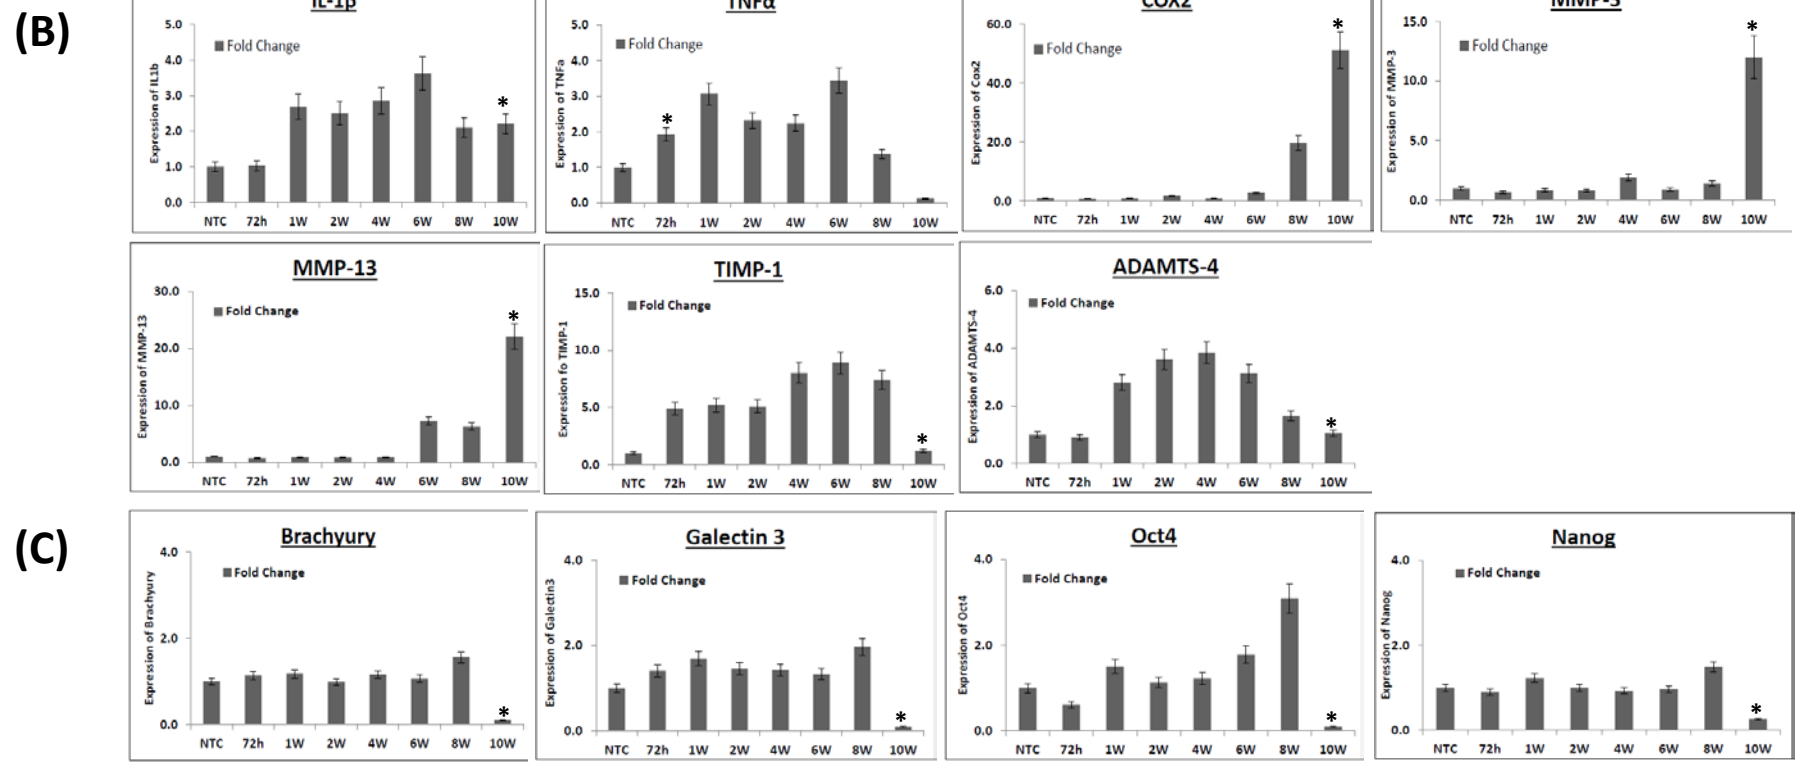



# Supplementary Fig. 2.

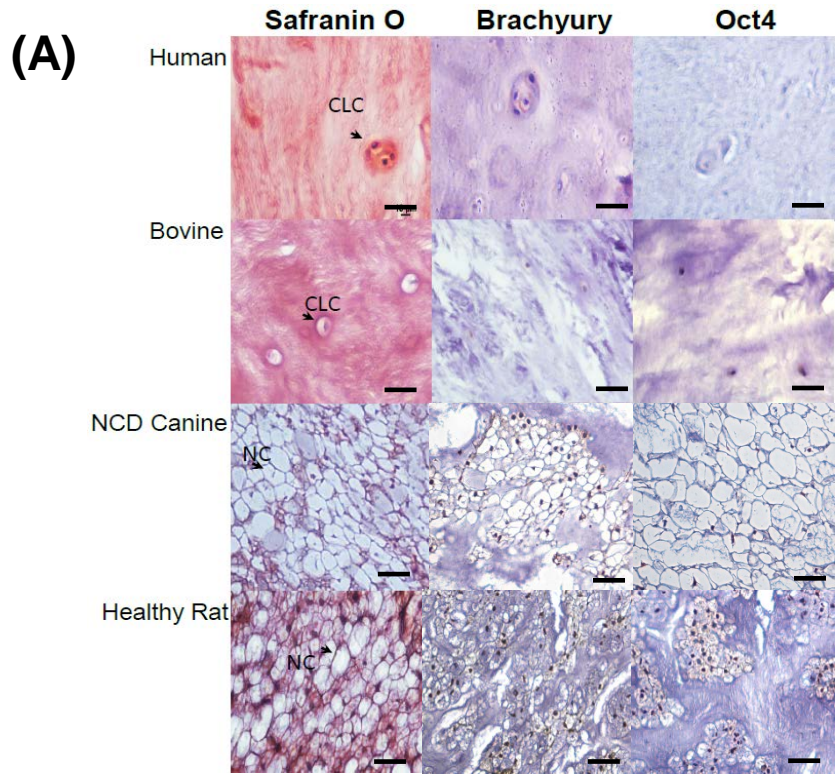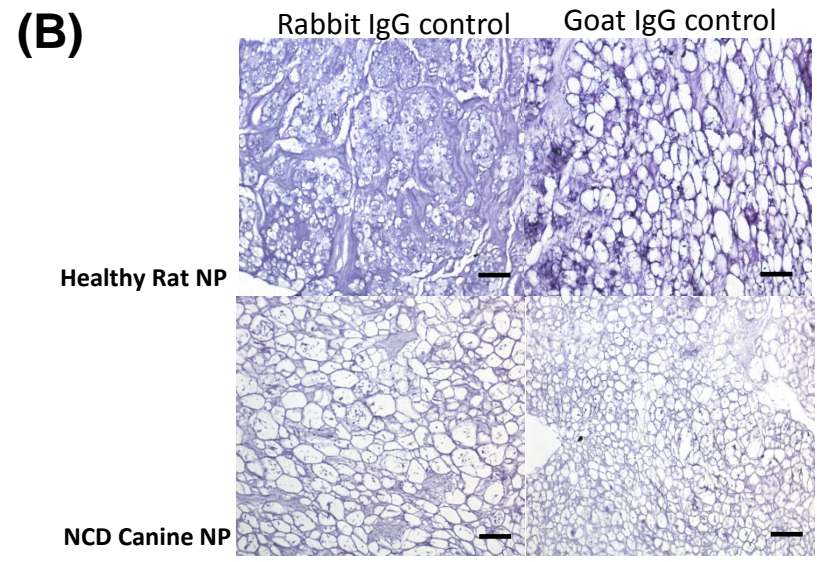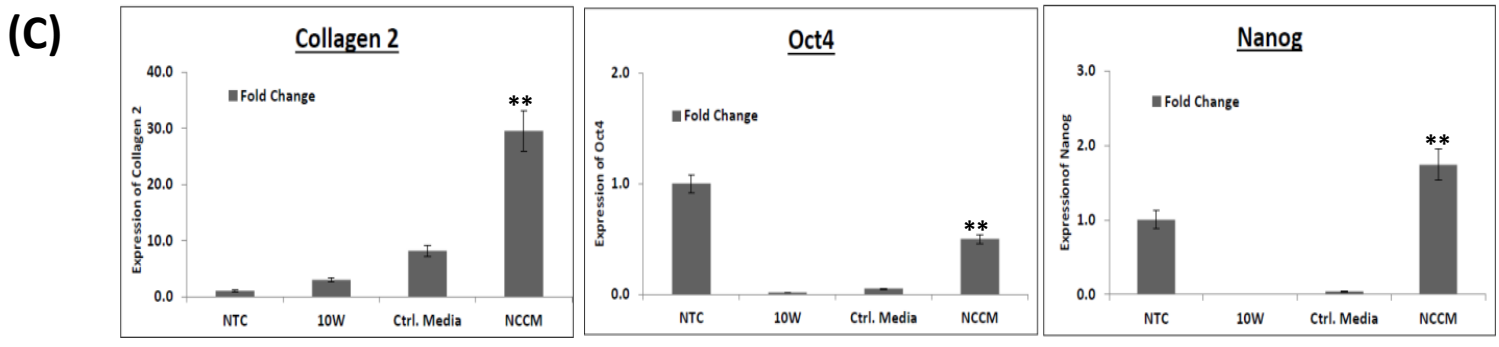

# Supplementary Fig. 3.

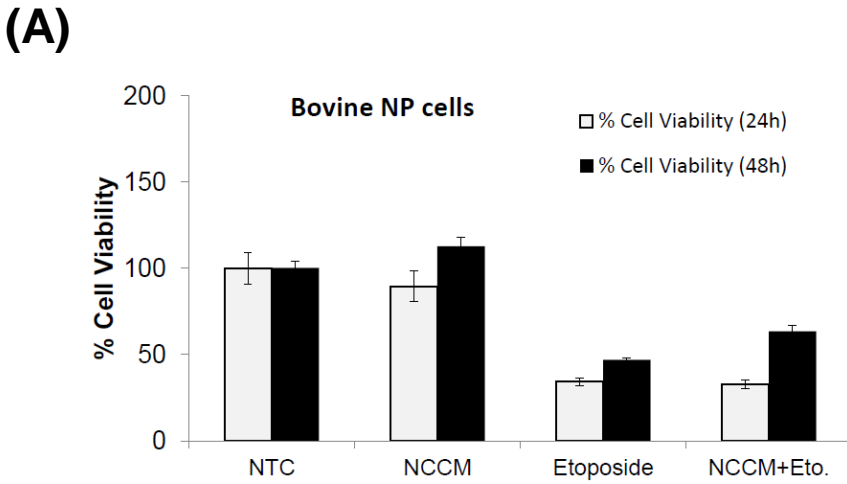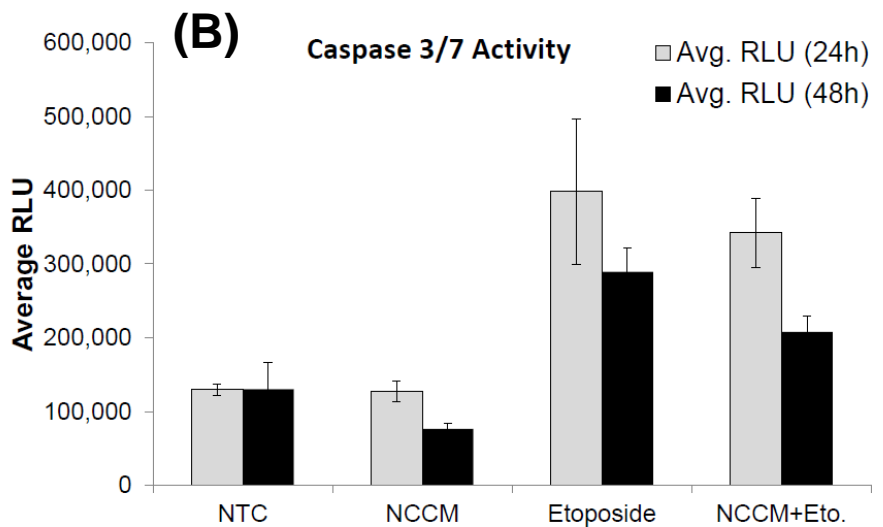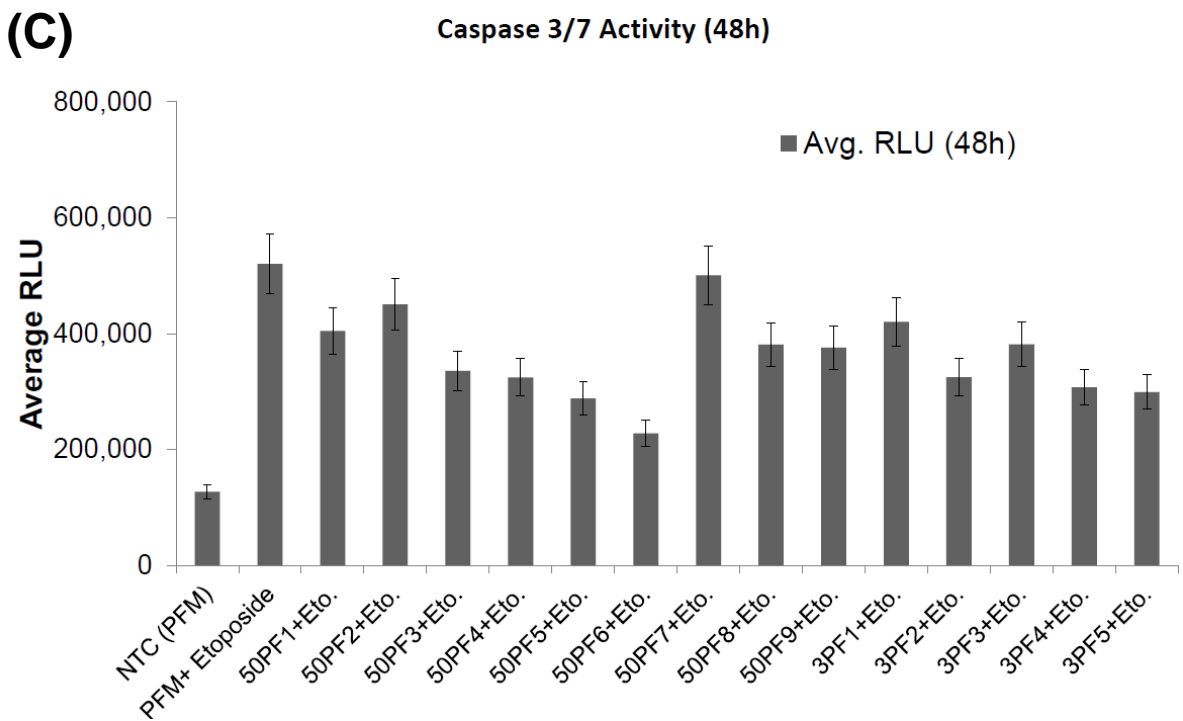

# Supplementary Fig. 4.

(A)

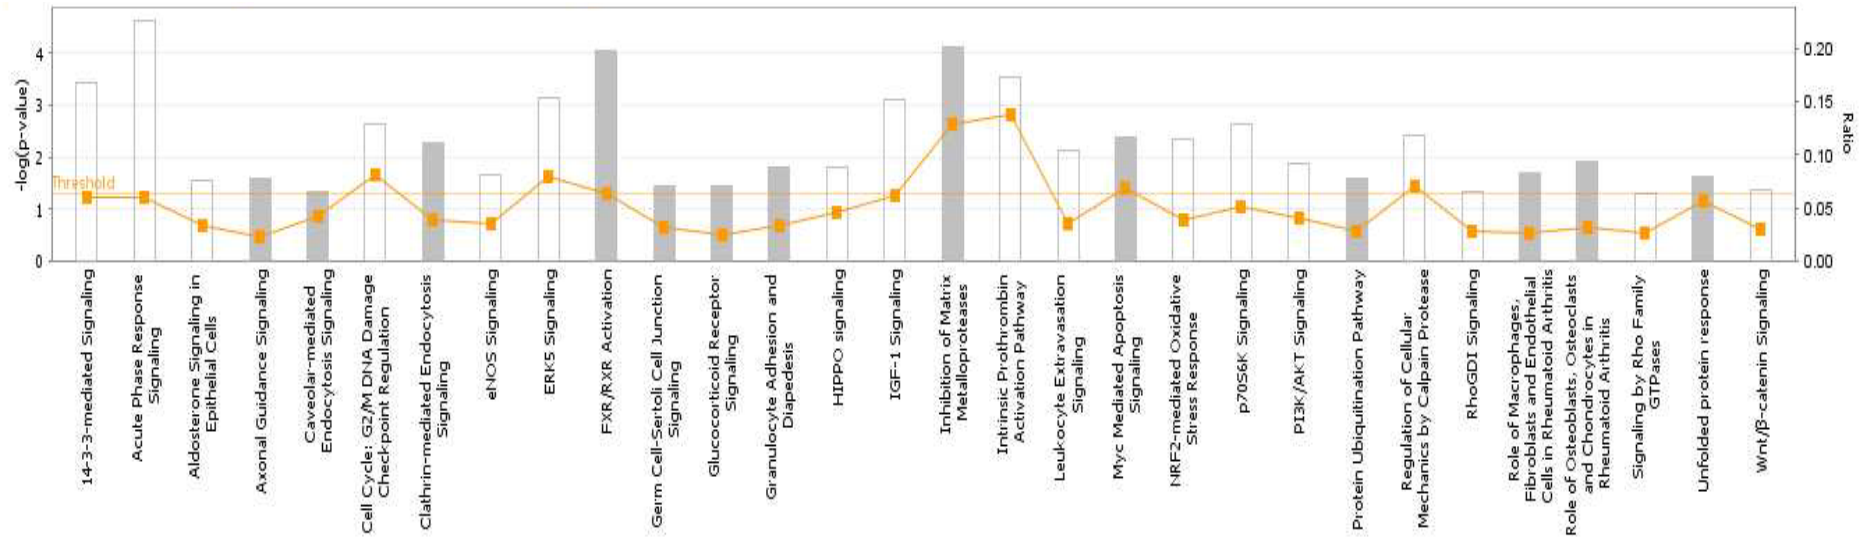



# Supplementary Fig. 4.

(C)

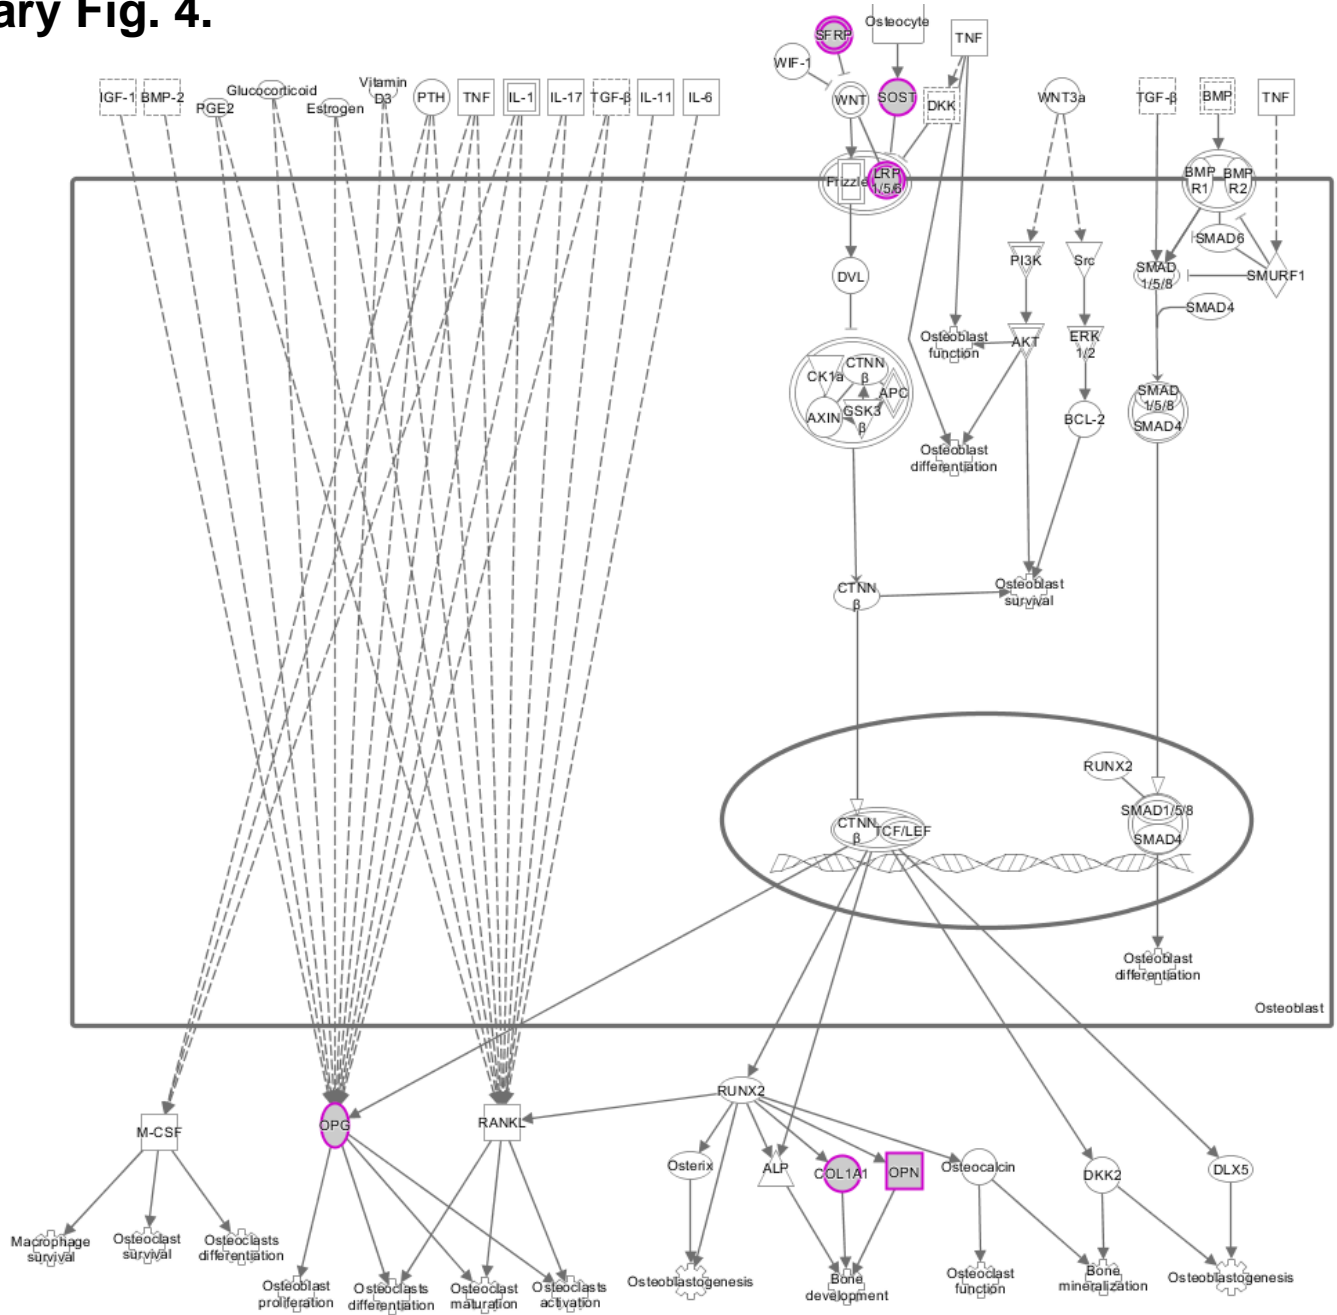



# Supplementary Fig. 5.

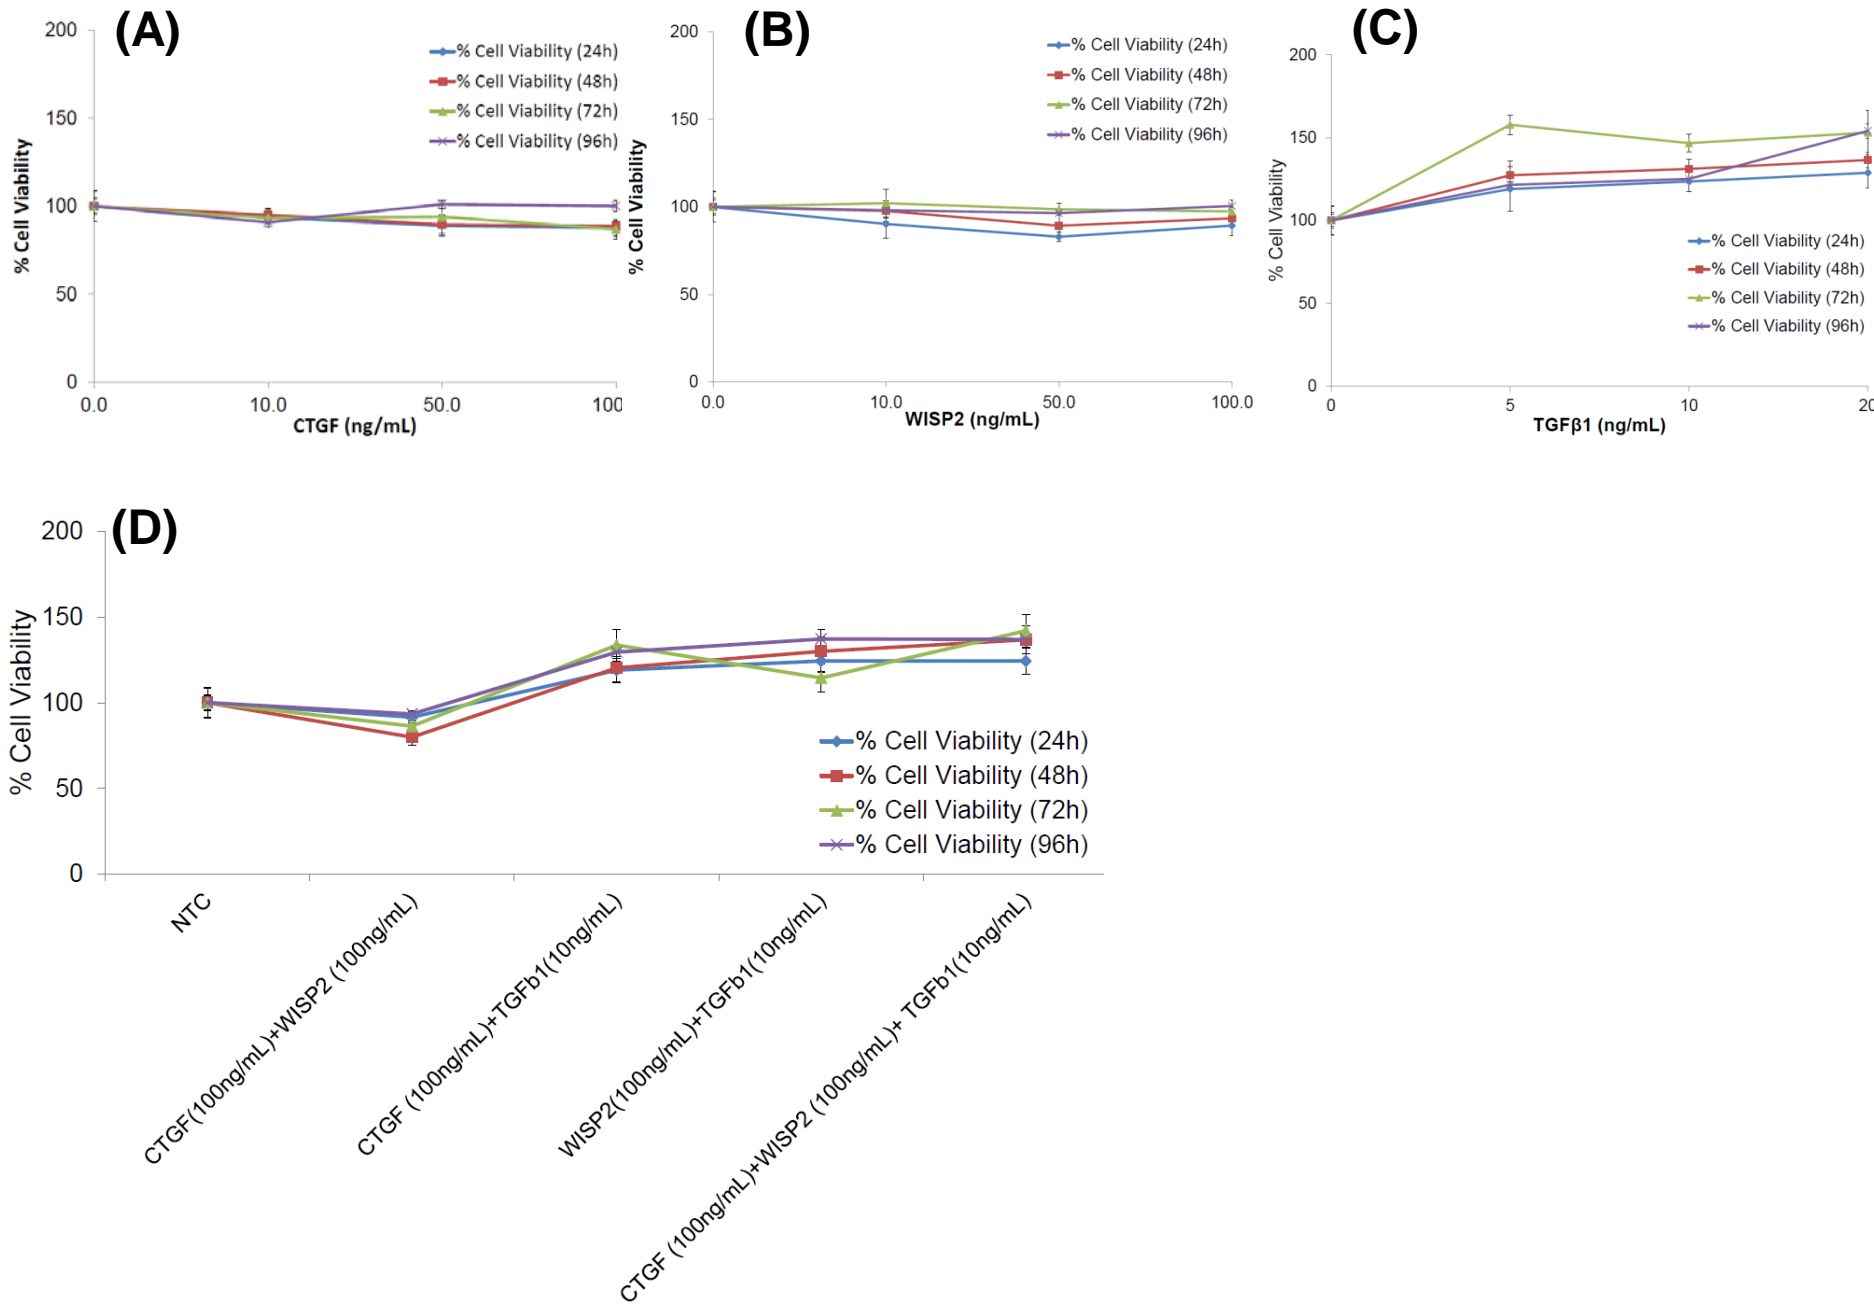

# Supplementary Fig. 6.

**(A)**

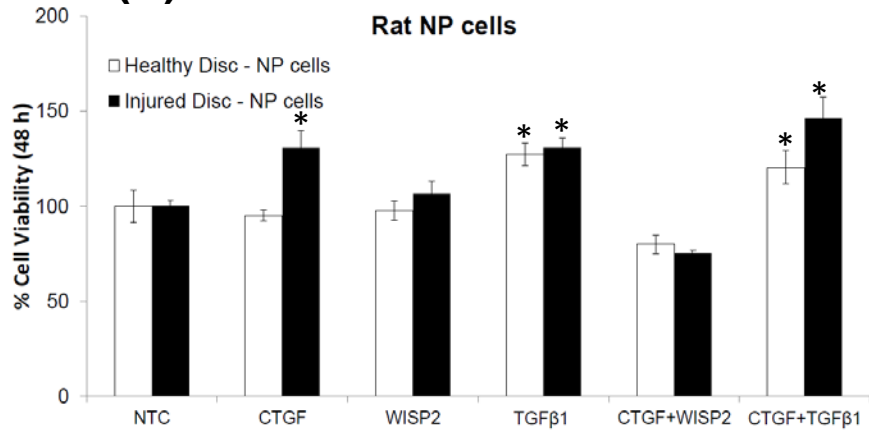

**(B)**

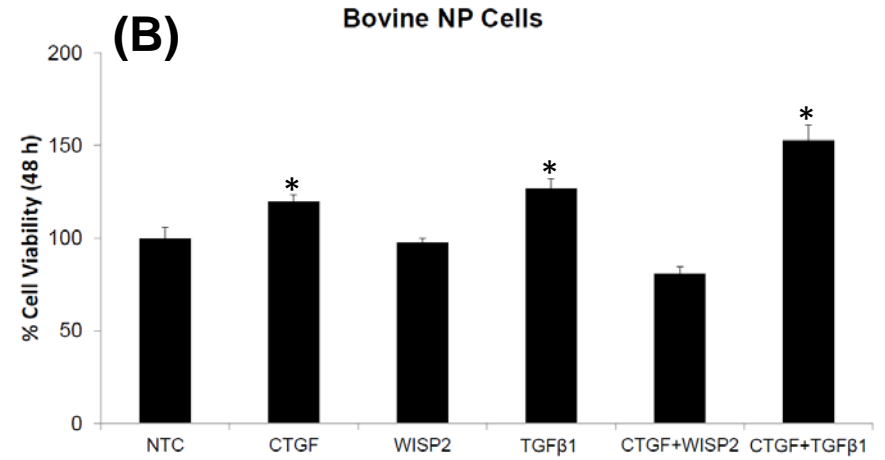

**(C)**

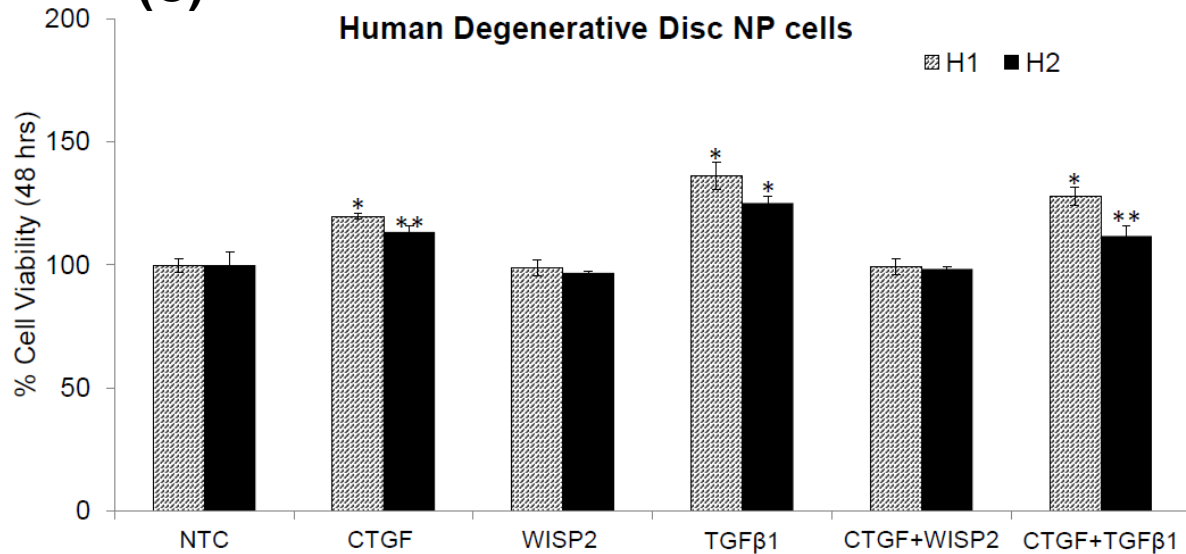



# Supplementary Fig. 7.

(A)

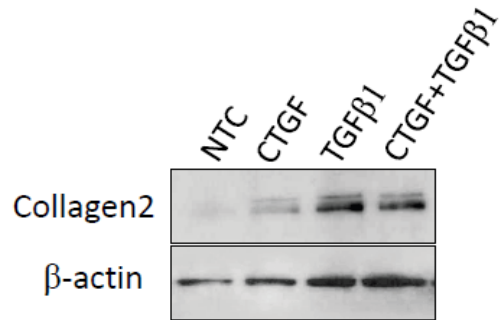

(B)

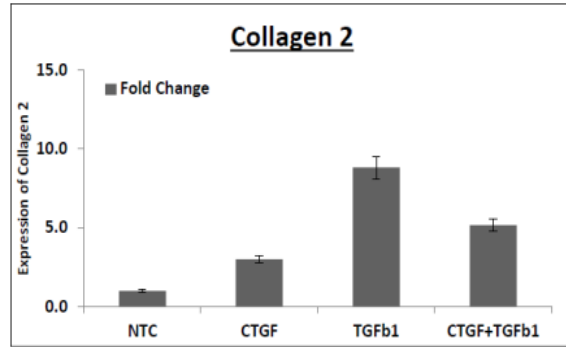

# Supplementary Fig. 8.

(A)

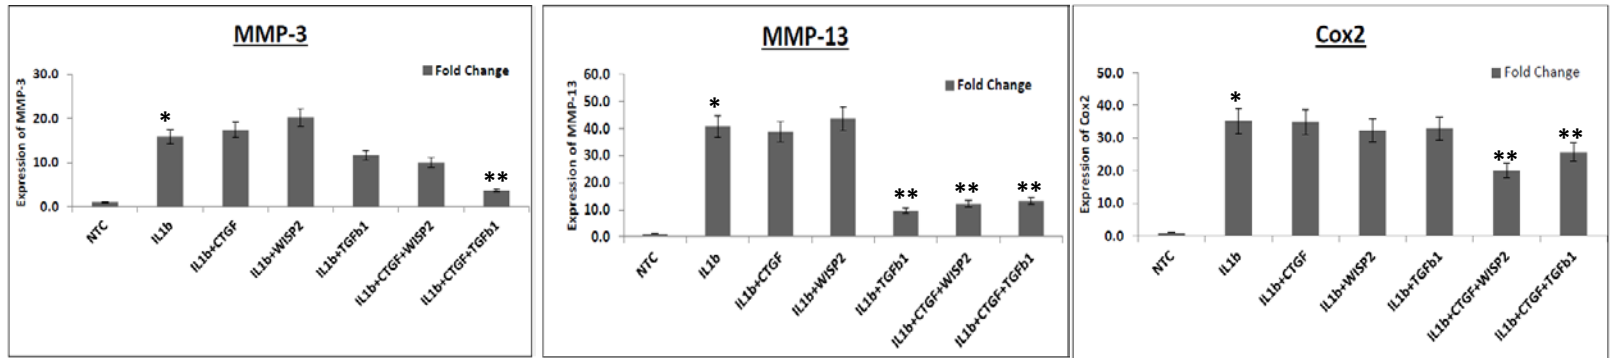

(B)

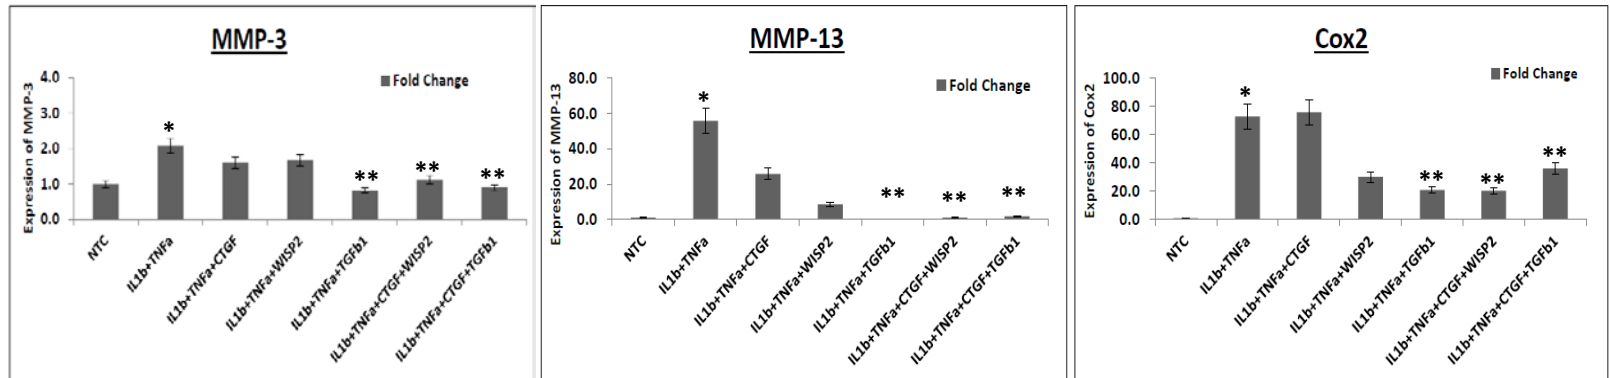

# Supplementary Fig. 9.

(A)

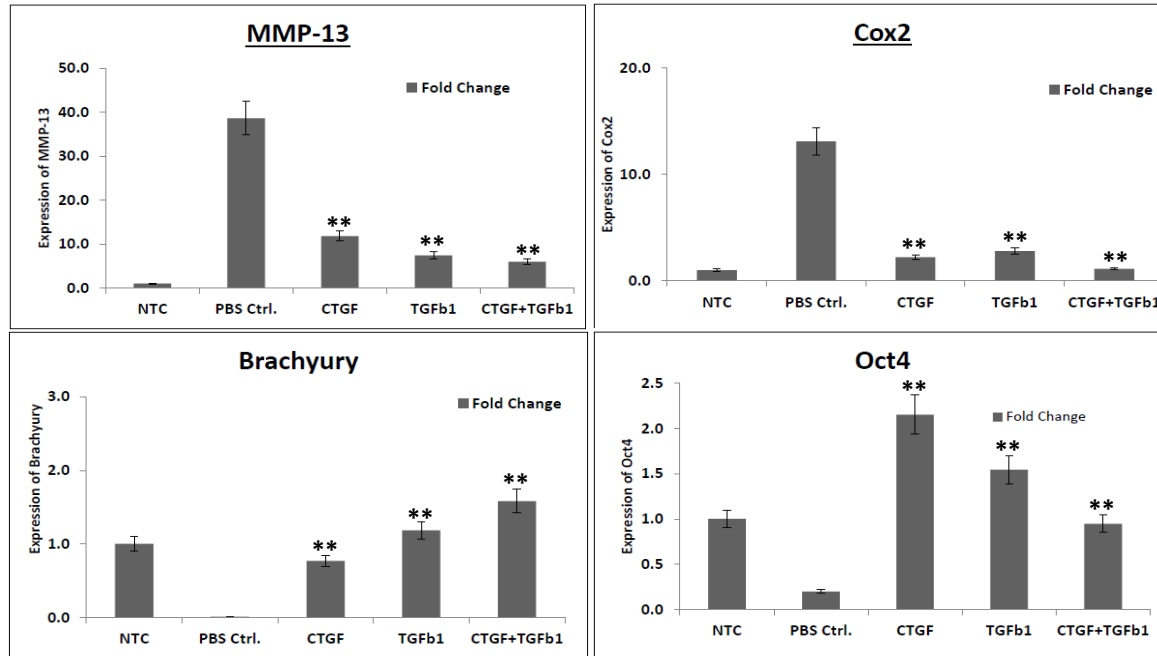

**Supplementary Table S1. List of proteins identified in NCCM**

| S. No. | Identified Proteins                                                                                                             | Accession Number  | Protein Name-FASTA                                                                       |
|--------|---------------------------------------------------------------------------------------------------------------------------------|-------------------|------------------------------------------------------------------------------------------|
| 1      | Uncharacterized protein (Fragment) OS=Canis familiaris<br>GN=TGFBI PE=4 SV=2                                                    | F1PW10_CANFA (+1) | Transforming Growth Factor Beta-1                                                        |
| 2      | Uncharacterized protein OS=Canis familiaris GN=CTGF PE=4<br>SV=1                                                                | J9NTX8_CANFA      | Connective Tissue Growth Factor                                                          |
| 3      | Uncharacterized protein OS=Canis familiaris GN=WISP2<br>PE=4 SV=2                                                               | E2RJ75_CANFA      | WNT1 Inducible Signaling Pathway Protein<br>2(CCN5)                                      |
| 4      | Uncharacterized protein OS=Canis familiaris GN=SOST PE=4<br>SV=1                                                                | J9P9E4_CANFA      | sclerostin (BMP antagonist)                                                              |
| 5      | Chordin OS=Canis familiaris GN=CHRD PE=3 SV=2<br>Uncharacterized protein (Fragment) OS=Canis familiaris                         | E2RBE4_CANFA (+1) | Chordin                                                                                  |
| 6      | GN=FSTL1 PE=4 SV=2<br>Uncharacterized protein OS=Canis familiaris GN=CD109                                                      | F1PY69_CANFA (+1) | Follistatin-Like Protein 1                                                               |
| 7      | PE=4 SV=2<br>Uncharacterized protein (Fragment) OS=Canis familiaris                                                             | F1PM26_CANFA      | CD109                                                                                    |
| 8      | GN=FRZB PE=4 SV=2<br>Uncharacterized protein OS=Canis familiaris GN=VWA1                                                        | F1PN55_CANFA      | Frizzled-Related Protein 1<br>Von Willebrand Factor A Domain-Containing<br>Protein 1     |
| 9      | PE=4 SV=1<br>Uncharacterized protein OS=Canis familiaris GN=IGFBP7                                                              | F6XL96_CANFA      | Insulin-Like Growth Factor Binding Protein 7                                             |
| 10     | PE=4 SV=1<br>Uncharacterized protein OS=Canis familiaris GN=IGFL3                                                               | E2RNL2_CANFA      | Insulin Growth Factor-Like Family Member 3                                               |
| 11     | PE=4 SV=1<br>Cation-independent mannose-6-phosphate/insulin-like growth<br>factor 2 receptor protein OS=Canis familiaris GN=CI- | E2QTE1_CANFA      | Cation-independent mannose-6-phosphate/insulin-<br>like growth factor 2 receptor protein |
| 12     | MPR/IGF2R PE=2 SV=1<br>Uncharacterized protein (Fragment) OS=Canis familiaris                                                   | B1H0W0_CANFA (+1) | EGFR                                                                                     |
| 13     | GN=EGFR PE=3 SV=2<br>Uncharacterized protein OS=Canis familiaris GN=EFEMP1                                                      | F1PF03_CANFA      | EGF-Containing Fibulin-Like Extracellular Matrix<br>Protein                              |
| 14     | PE=4 SV=1<br>Uncharacterized protein OS=Canis familiaris GN=EDIL3                                                               | E2R612_CANFA      | EGF-Like Repeat And Discoidin I-Like Domain-<br>Containing Protein 32                    |
| 15     | PE=4 SV=2<br>Uncharacterized protein OS=Canis familiaris GN=EFEMP2                                                              | F1P8D5_CANFA      | EGF-Containing Fibulin-Like Extracellular Matrix<br>Protein 2                            |
| 16     | PE=4 SV=1<br>Uncharacterized protein (Fragment) OS=Canis familiaris                                                             | E2RNX7_CANFA      | Olfactomedin-Like Protein 2B                                                             |
| 17     | GN=OLFML2B PE=4 SV=2<br>Uncharacterized protein OS=Canis familiaris GN=OLFML3                                                   | F1PAD2_CANFA      | Olfactomedin-Like 3                                                                      |
| 18     | PE=4 SV=2<br>Uncharacterized protein OS=Canis familiaris GN=OGN PE=4                                                            | F1PQV4_CANFA      | Osteoglycin                                                                              |
| 19     | SV=2<br>Uncharacterized protein OS=Canis familiaris GN=SPARC                                                                    | E2RNR0_CANFA      | Secreted Protein, Acidic, Cysteine-Rich<br>(Osteonectin)                                 |
| 20     | PE=4 SV=1<br>Uncharacterized protein OS=Canis familiaris GN=SPP1 PE=4                                                           | E2RMA3_CANFA      | Secreted Phosphoprotein 1 (Osteopontin)                                                  |
| 21     | SV=1<br>Uncharacterized protein (Fragment) OS=Canis familiaris                                                                  | E2R161_CANFA (+1) | Peripherin                                                                               |
| 22     | GN=PRPH PE=3 SV=2<br>Uncharacterized protein OS=Canis familiaris GN=GFAP                                                        | F1PGH6_CANFA      | Glial Fibrillary Acidic Protein1                                                         |
| 23     | PE=3 SV=1<br>Uncharacterized protein OS=Canis familiaris GN=ANGPTL7                                                             | E2RS09_CANFA      | Angiopoietin-Like 7                                                                      |
| 24     | PE=4 SV=1<br>Uncharacterized protein OS=Canis familiaris GN=SLIT3 PE=3                                                          | E2R2G1_CANFA      | Slit Homolog 3 (Drosophila)                                                              |
| 25     | SV=2<br>Uncharacterized protein (Fragment) OS=Canis familiaris                                                                  | F1Q3G2_CANFA      | Receptor Tyrosine Kinase-Like Orphan Receptor 2                                          |
| 26     | GN=ROR2 PE=4 SV=2<br>Uncharacterized protein OS=Canis familiaris GN=PTN PE=4                                                    | F1PSD7_CANFA      | pleiotrophin, Neurite Growth-Promoting Factor 11                                         |
| 27     | SV=1<br>Uncharacterized protein OS=Canis familiaris GN=LRP1 PE=4                                                                | E2R8H9_CANFA (+1) | Low Density Lipoprotein Receptor-Related Protein 1                                       |
| 28     | SV=2<br>Uncharacterized protein OS=Canis familiaris GN=VLDLR                                                                    | E2R4Q1_CANFA (+1) | Very Low Density Lipoprotein Receptor                                                    |
| 29     | PE=4 SV=2<br>Uncharacterized protein (Fragment) OS=Canis familiaris                                                             | F1P787_CANFA      | Low Density Lipoprotein Receptor-Related Protein<br>1B                                   |
| 30     | GN=LRP1B PE=4 SV=2<br>Uncharacterized protein (Fragment) OS=Canis familiaris                                                    | F1PNZ9_CANFA (+1) | Low Density Lipoprotein Receptor-Related Protein 2                                       |
| 31     | GN=LRP2 PE=4 SV=2<br>Uncharacterized protein OS=Canis familiaris GN=THY1 PE=4                                                   | F1PIB4_CANFA      | CD90                                                                                     |
| 32     | SV=1<br>Metalloproteinase inhibitor 1 OS=Canis familiaris GN=TIMP1                                                              | J9P7X2_CANFA      | TIMP1                                                                                    |
| 33     | PE=4 SV=2<br>Metalloproteinase inhibitor 2 (Fragment) OS=Canis familiaris                                                       | F1PQS2_CANFA (+1) | TIMP2                                                                                    |
| 34     | GN=TIMP2 PE=4 SV=2<br>Timp3 OS=Canis familiaris GN=timp3 PE=2 SV=1                                                              | F1Q4F9_CANFA      | Timp3                                                                                    |
| 35     | Uncharacterized protein (Fragment) OS=Canis familiaris                                                                          | F5CBP3_CANFA (+1) | COL15A1                                                                                  |
| 36     | GN=COL15A1 PE=4 SV=1                                                                                                            | F1PS66_CANFA (+1) |                                                                                          |

Supplementary Table S1 contd.

| S. No. | Identified Proteins                                      | Accession Number  | Protein Name-FASTA                                                             |
|--------|----------------------------------------------------------|-------------------|--------------------------------------------------------------------------------|
|        | Cluster of Uncharacterized protein OS=Canis familiaris   |                   |                                                                                |
| 37     | GN=COL6A3 PE=4 SV=2 (F1PR31_CANFA)                       | F1PR31_CANFA [3]  | COL6A3                                                                         |
|        | Uncharacterized protein OS=Canis familiaris GN=COL6A1    |                   |                                                                                |
| 38     | PE=4 SV=2                                                | F1PFM6_CANFA      | COL6A1                                                                         |
|        | Uncharacterized protein OS=Canis familiaris GN=COL2A1    |                   |                                                                                |
| 39     | PE=4 SV=1                                                | F1PS24_CANFA (+1) | COL2A1                                                                         |
|        | Cluster of Uncharacterized protein OS=Canis familiaris   |                   |                                                                                |
| 40     | GN=COL11A2 PE=4 SV=1 (F1PQD5_CANFA)                      | F1PQD5_CANFA [2]  | COL11A2                                                                        |
|        | Uncharacterized protein OS=Canis familiaris GN=COL12A1   |                   |                                                                                |
| 41     | PE=4 SV=1                                                | F6XWS5_CANFA (+1) | COL12A1                                                                        |
|        | Uncharacterized protein OS=Canis familiaris GN=COL3A1    |                   |                                                                                |
| 42     | PE=4 SV=2                                                | F1PG69_CANFA (+1) | COL3A1                                                                         |
| 43     | PE=1 SV=1                                                | CO1A1_CANFA (+1)  | Collagen alpha-1                                                               |
|        | Uncharacterized protein (Fragment) OS=Canis familiaris   |                   |                                                                                |
| 44     | GN=COL11A1 PE=4 SV=2                                     | F1PD36_CANFA (+1) | COL11A1                                                                        |
|        | Uncharacterized protein OS=Canis familiaris GN=COL5A2    |                   |                                                                                |
| 45     | PE=4 SV=2                                                | F1PG08_CANFA      | COL5A2                                                                         |
|        | Uncharacterized protein OS=Canis familiaris GN=PCOLCE2   |                   |                                                                                |
| 46     | PE=4 SV=1                                                | E2R7L9_CANFA (+2) | Procollagen C-Proteinase Enhancer 1                                            |
|        | Aggrecan core protein OS=Canis familiaris GN=ACAN PE=4   |                   |                                                                                |
| 47     | SV=1                                                     | F1PWT9_CANFA      | Aggrecan core protein                                                          |
| 48     | Fibronectin OS=Canis familiaris GN=FN1 PE=4 SV=1         | J9P8M2_CANFA      | Fibronectin                                                                    |
|        | Uncharacterized protein (Fragment) OS=Canis familiaris   |                   |                                                                                |
| 49     | GN=HSPG2 PE=4 SV=1                                       | J9NRJ0_CANFA      | Heparan Sulfate Proteoglycan Core Protein, Perlecan                            |
|        | Uncharacterized protein OS=Canis familiaris GN=LUM PE=4  |                   |                                                                                |
| 50     | SV=1                                                     | E2R416_CANFA      | Lumican Proteoglycan                                                           |
|        | Uncharacterized protein OS=Canis familiaris GN=PRG4 PE=4 |                   |                                                                                |
| 51     | SV=2                                                     | F1PXD6_CANFA      | Proteoglycan 4                                                                 |
|        | Uncharacterized protein OS=Canis familiaris GN=CHAD      |                   |                                                                                |
| 52     | PE=4 SV=1                                                | E2QRS3_CANFA      | Chondroadherin Proteoglycan, Cartilage Leucine-Rich Protein                    |
|        | Uncharacterized protein OS=Canis familiaris GN=VCAN      |                   |                                                                                |
| 53     | PE=4 SV=2                                                | F1PGL1_CANFA      | Versican                                                                       |
| 54     | Decorin OS=Canis familiaris GN=DCN PE=2 SV=2             | PGS2_CANFA        | Decorin                                                                        |
|        | Uncharacterized protein OS=Canis familiaris GN=HAPLN1    |                   |                                                                                |
| 55     | PE=4 SV=1                                                | J9PAT9_CANFA      | HAPLN1                                                                         |
| 56     | Biglycan OS=Canis familiaris GN=BGN PE=4 SV=1            | G1K2D8_CANFA (+1) | Biglycan                                                                       |
|        | Uncharacterized protein OS=Canis familiaris GN=FMOD      |                   |                                                                                |
| 57     | PE=4 SV=2                                                | F1PLN5_CANFA      | Fibromodulin                                                                   |
|        | Uncharacterized protein (Fragment) OS=Canis familiaris   |                   |                                                                                |
| 58     | GN=TNC PE=4 SV=1                                         | F1PF31_CANFA (+1) | TNC                                                                            |
|        | Uncharacterized protein OS=Canis familiaris GN=GSN PE=4  |                   |                                                                                |
| 59     | SV=1                                                     | F6Y3P9_CANFA      | Gelsolin                                                                       |
|        | Uncharacterized protein OS=Canis familiaris GN=CSPG4     |                   |                                                                                |
| 60     | PE=4 SV=1                                                | J9P6X3_CANFA      | Chondroitin Sulfate Proteoglycan 4                                             |
|        | Uncharacterized protein OS=Canis familiaris GN=THBS4     |                   |                                                                                |
| 61     | PE=4 SV=2                                                | F1PSS2_CANFA      | Thrombospondin 4                                                               |
|        | Uncharacterized protein OS=Canis familiaris GN=PRELP     |                   |                                                                                |
| 62     | PE=4 SV=1                                                | E2RL80_CANFA      | Proline-Arginine-Rich End Leucine-Rich Repeat Protein2,Prolargin Proteoglycan1 |
|        | Uncharacterized protein OS=Canis familiaris GN=OMD PE=4  |                   |                                                                                |
| 63     | SV=2                                                     | E2RNR9_CANFA (+1) | osteomodulin, Keratan Sulfate Proteoglycan Osteomodulin2                       |
|        | Cluster of Uncharacterized protein OS=Canis familiaris   |                   |                                                                                |
| 64     | GN=NEBL PE=4 SV=2 (F1PQ88_CANFA)                         | F1PQ88_CANFA [2]  | Nebulette                                                                      |
|        | Uncharacterized protein OS=Canis familiaris GN=PSAP PE=4 |                   |                                                                                |
| 65     | SV=1                                                     | E2RLF1_CANFA      | prosaposin                                                                     |
| 66     | Fibulin-1 OS=Canis familiaris GN=FBLN1 PE=3 SV=2         | F1PLV6_CANFA      | Fibulin-1                                                                      |
|        | Uncharacterized protein OS=Canis familiaris GN=ABI3BP    |                   |                                                                                |
| 67     | PE=4 SV=2                                                | F1PKX2_CANFA      | ABI Gene Family, Member 3 (NESH) Binding Protein2                              |
|        | Uncharacterized protein OS=Canis familiaris GN=NID2 PE=4 |                   |                                                                                |
| 68     | SV=2                                                     | F1P7Y6_CANFA      | nidogen-2                                                                      |
|        | Uncharacterized protein OS=Canis familiaris GN=SEMA3C    |                   |                                                                                |
| 69     | PE=4 SV=2                                                | E2R0R3_CANFA      | Semaphorin                                                                     |
|        | Uncharacterized protein OS=Canis familiaris GN=SEMA3E    |                   |                                                                                |
| 70     | PE=4 SV=2                                                | F1Q4C1_CANFA      | semaphorin-3E                                                                  |
|        | Cluster of Uncharacterized protein OS=Canis familiaris   |                   |                                                                                |
| 71     | GN=COMP PE=4 SV=2 (E2RJE0_CANFA)                         | E2RJE0_CANFA [2]  | Cartilage Oligomeric Matrix Protein1                                           |
|        | Uncharacterized protein OS=Canis familiaris GN=CILP2     |                   |                                                                                |
| 72     | PE=4 SV=2                                                | E2RCP2_CANFA      | Cartilage Intermediate Layer Protein-Like Protein 2                            |
|        | Uncharacterized protein OS=Canis familiaris GN=CILP PE=4 |                   |                                                                                |
| 73     | SV=1                                                     | F6V790_CANFA      | CILP                                                                           |

Supplementary Table 1 contd.

| S. No. | Identified Proteins                                                                                                               | Accession Number                                                    | Protein Name-FASTA                                                                                                                                            |
|--------|-----------------------------------------------------------------------------------------------------------------------------------|---------------------------------------------------------------------|---------------------------------------------------------------------------------------------------------------------------------------------------------------|
| 74     | Galectin OS=Canis familiaris GN=LGALS3 PE=2 SV=1<br>Uncharacterized protein (Fragment) OS=Canis familiaris<br>GN=CLSTN1 PE=4 SV=1 | E5Q8W5_CANFA (+2)                                                   | Galectin                                                                                                                                                      |
| 75     | Uncharacterized protein OS=Canis familiaris GN=LOXL3<br>PE=4 SV=1                                                                 | F1PE64_CANFA                                                        | Calsyntenin 1                                                                                                                                                 |
| 76     | Uncharacterized protein OS=Canis familiaris GN=SMOC1<br>PE=4 SV=2                                                                 | E2QYZ4_CANFA                                                        | LOXL3                                                                                                                                                         |
| 77     | Uncharacterized protein OS=Canis familiaris GN=SDCBP<br>PE=4 SV=2                                                                 | F1P8D9_CANFA                                                        | SPARC-Related Modular Calcium-Binding Protein 1                                                                                                               |
| 78     | Dystroglycan OS=Canis familiaris GN=DAG1 PE=3 SV=1                                                                                | F1PKR0_CANFA                                                        | Syndecan Binding Protein (Syntenin)                                                                                                                           |
| 79     | Clusterin OS=Canis familiaris GN=CLU PE=2 SV=1                                                                                    | DAG1_CANFA                                                          | Dystroglycan                                                                                                                                                  |
| 80     | Desmin OS=Canis familiaris GN=DES PE=3 SV=3<br>Uncharacterized protein (Fragment) OS=Canis familiaris<br>GN=GPC1 PE=3 SV=1        | CLUS_CANFA                                                          | Clusterin                                                                                                                                                     |
| 81     | Cluster of Uncharacterized protein (Fragment) OS=Canis<br>familiaris GN=VCL PE=4 SV=2 (F1PKR3_CANFA)                              | DESM_CANFA                                                          | Desmin                                                                                                                                                        |
| 82     | Uncharacterized protein OS=Canis familiaris GN=FBN1 PE=4<br>SV=2                                                                  | F1PPA1_CANFA                                                        | Glypican Proteoglycan 1                                                                                                                                       |
| 83     | Uncharacterized protein OS=Canis familiaris GN=MATN2<br>PE=4 SV=2                                                                 | F1PKR3_CANFA [2]                                                    | vinculin                                                                                                                                                      |
| 84     | Uncharacterized protein OS=Canis familiaris GN=VIT PE=4<br>SV=2                                                                   | F1PIA3_CANFA                                                        | Fibrillin 1                                                                                                                                                   |
| 85     | Tumor necrosis factor receptor superfamily member 11B<br>OS=Canis familiaris GN=TNFRSF11B PE=3 SV=1                               | F1PGH3_CANFA (+1)                                                   | Matrilin 2                                                                                                                                                    |
| 86     | Cluster of Uncharacterized protein OS=Canis familiaris<br>GN=LYPD8 PE=4 SV=1 (F6XCE8_CANFA)                                       | E2QY57_CANFA (+1)                                                   | VIT<br>Tumor necrosis factor receptor superfamily<br>member 11B                                                                                               |
| 87     | Uncharacterized protein OS=Canis familiaris GN=CLEC3A<br>PE=4 SV=1                                                                | F6V4E0_CANFA                                                        | Ly6/PLAUR Domain-Containing Protein 8<br>C-Type (Calcium Dependent, Carbohydrate-<br>Recognition Domain) Lectin, Superfamily Member 1<br>(Cartilage-Derived)1 |
| 88     | Uncharacterized protein OS=Canis familiaris GN=LGALS3BP<br>PE=4 SV=1                                                              | F6XCE8_CANFA [2]                                                    | Lectin Galactoside-Binding Soluble 3-Binding<br>Protein2                                                                                                      |
| 89     | Uncharacterized protein OS=Canis familiaris GN=CCL16<br>PE=4 SV=1                                                                 | E2RQC0_CANFA                                                        | IL-10-Inducible Chemokine                                                                                                                                     |
| 90     | Uncharacterized protein (Fragment) OS=Canis familiaris<br>GN=MFGE8 PE=4 SV=2                                                      | J9NV49_CANFA                                                        | Milk Fat Globule-EGF Factor 8                                                                                                                                 |
| 91     | Uncharacterized protein OS=Canis familiaris GN=CCDC80<br>PE=4 SV=2                                                                | F1PFZ5_CANFA                                                        | Coiled-Coil Domain-Containing Protein 80                                                                                                                      |
| 92     | Rab GDP dissociation inhibitor beta (Fragment) OS=Canis<br>familiaris GN=GDI2 PE=4 SV=1                                           | E2RGR7_CANFA                                                        | Rab GDP dissociation inhibitor beta                                                                                                                           |
| 93     | Uncharacterized protein (Fragment) OS=Canis familiaris<br>GN=PTGFRN PE=4 SV=2                                                     | F1P8L7_CANFA                                                        | Prostaglandin F2 Receptor Inhibitor                                                                                                                           |
| 94     | Uncharacterized protein (Fragment) OS=Canis familiaris<br>GN=HTRA1 PE=4 SV=2                                                      | F1PR26_CANFA                                                        | HtrA Serine Peptidase 1                                                                                                                                       |
| 95     | Uncharacterized protein OS=Canis familiaris GN=KAL1 PE=4<br>SV=2                                                                  | F1PU95_CANFA                                                        | Kallmann Syndrome 1 Sequence                                                                                                                                  |
| 96     | Uncharacterized protein OS=Canis familiaris GN=TSPAN8<br>PE=4 SV=1                                                                | F1Q1G0_CANFA                                                        | tetraspanin-8                                                                                                                                                 |
| 97     | Uncharacterized protein OS=Canis familiaris GN=PARK7<br>PE=4 SV=1                                                                 | E2QSC8_CANFA                                                        | Parkinson Protein 7                                                                                                                                           |
| 98     | Sulfhydryl oxidase (Fragment) OS=Canis familiaris<br>GN=QSOX1 PE=3 SV=2                                                           | E2QS13_CANFA                                                        | Sulfhydryl oxidase                                                                                                                                            |
| 99     | CC chemokine ligand 21 OS=Canis familiaris GN=CCL21<br>PE=2 SV=1                                                                  | F1PLT8_CANFA                                                        | CCL21                                                                                                                                                         |
| 100    | Uncharacterized protein OS=Canis familiaris GN=WDR1<br>PE=2 SV=2                                                                  | Q68AM9_CANFA                                                        | CCL21                                                                                                                                                         |
| 101    | Uncharacterized protein OS=Canis familiaris GN=CDH2 PE=3<br>SV=2                                                                  | F1PR93_CANFA                                                        | WD Repeat-Containing Protein 1                                                                                                                                |
| 102    | Cadherin-1 OS=Canis familiaris GN=CDH1 PE=1 SV=2<br>Uncharacterized protein (Fragment) OS=Canis familiaris<br>GN=NCAM1 PE=4 SV=2  | F1PEC4_CANFA                                                        | CDH2                                                                                                                                                          |
| 103    | Uncharacterized protein OS=Canis familiaris GN=BCAM<br>PE=4 SV=2                                                                  | CADH1_CANFA (+1)                                                    | Cadherin-1                                                                                                                                                    |
| 104    | Uncharacterized protein (Fragment) OS=Canis familiaris<br>GN=NCAN PE=4 SV=2                                                       | F1PMU2_CANFA (+3)                                                   | Neural Cell Adhesion Molecule 1                                                                                                                               |
| 105    | Uncharacterized protein (Fragment) OS=Canis familiaris<br>GN=NCAM1 PE=4 SV=2                                                      | F1PWJ7_CANFA (+1)                                                   | Basal Cell Adhesion Molecule                                                                                                                                  |
| 106    | Trappin-2 OS=Canis familiaris GN=PI3 PE=4 SV=1                                                                                    | E2RBU8_CANFA                                                        | neurocan (Chondroitin Sulfate Proteoglycan 3)                                                                                                                 |
| 107    | Galectin OS=Canis familiaris GN=LGALS1 PE=2 SV=1<br>Uncharacterized protein OS=Canis familiaris GN=XIRP2<br>PE=4 SV=2             | D3DMB4_CANFA                                                        | Trappin                                                                                                                                                       |
| 108    | Uncharacterized protein OS=Canis familiaris GN=CD55 PE=4<br>SV=1                                                                  | E2RJL1_CANFA (+1)                                                   | Galectin                                                                                                                                                      |
| 109    | Uncharacterized protein OS=Canis familiaris GN=CD55 PE=4<br>SV=1                                                                  | F1PCJ4_CANFA-DECOY (- Xin Actin-Binding Repeat-Containing Protein 2 | Decay Accelerating Factor For Complement (CD55,                                                                                                               |
| 110    |                                                                                                                                   | J9NTG7_CANFA                                                        |                                                                                                                                                               |
| 111    |                                                                                                                                   |                                                                     |                                                                                                                                                               |

Supplementary Table S1 contd.

| S. No. | Identified Proteins                                           | Accession Number  | Protein Name-FASTA                                             |
|--------|---------------------------------------------------------------|-------------------|----------------------------------------------------------------|
|        | Uncharacterized protein OS=Canis familiaris GN=GM2A           |                   |                                                                |
| 112    | PE=4 SV=2                                                     | F1P8U3_CANFA      | GM2 Ganglioside Activator                                      |
|        | Uncharacterized protein (Fragment) OS=Canis familiaris        |                   |                                                                |
| 113    | GN=CXCL12 PE=4 SV=2                                           | F1PNB2_CANFA      | CXCL12                                                         |
|        | Uncharacterized protein OS=Canis familiaris GN=LECT2          |                   |                                                                |
| 114    | PE=4 SV=1                                                     | E2RCY6_CANFA      | Leukocyte Cell-Derived Chemotaxin-2                            |
|        | Uncharacterized protein OS=Canis familiaris GN=EHD3 PE=4      |                   |                                                                |
| 115    | SV=2                                                          | F1PXX1_CANFA      | EH-Domain Containing 3                                         |
|        | Uncharacterized protein OS=Canis familiaris GN=FOLR2          |                   |                                                                |
| 116    | PE=4 SV=1                                                     | E2QXF0_CANFA      | Folate Receptor 2 (Fetal)                                      |
|        | Uncharacterized protein OS=Canis familiaris GN=PDCD6          |                   |                                                                |
| 117    | PE=4 SV=2                                                     | F1Q1H3_CANFA      | Programmed Cell Death 6                                        |
|        | Uncharacterized protein OS=Canis familiaris GN=SSC5D          |                   |                                                                |
| 118    | PE=4 SV=2                                                     | E2R0D2_CANFA      | Scavenger Receptor Cysteine Rich Domain Containing (5 Domains) |
|        | Uncharacterized protein OS=Canis familiaris GN=EML2 PE=4      |                   |                                                                |
| 119    | SV=2                                                          | E2RII4_CANFA (+1) | Echinoderm Microtubule Associated Protein Like 2               |
|        | Uncharacterized protein OS=Canis familiaris GN=FAM3C          |                   |                                                                |
| 120    | PE=4 SV=2                                                     | F1PGP3_CANFA      | Family With Sequence Similarity 3, Member C                    |
|        | Uncharacterized protein OS=Canis familiaris GN=CD63 PE=4      |                   |                                                                |
| 121    | SV=2                                                          | F1PIT4_CANFA      | Tetraspanin-30                                                 |
|        | Uncharacterized protein OS=Canis familiaris GN=S100A6         |                   |                                                                |
| 122    | PE=4 SV=1                                                     | E2R5P5_CANFA      | S100A6                                                         |
|        | Uncharacterized protein OS=Canis familiaris GN=S100A13        |                   |                                                                |
| 123    | PE=4 SV=1                                                     | E2R9P2_CANFA      | S100A13                                                        |
|        | Uncharacterized protein OS=Canis familiaris GN=LAMP1          |                   |                                                                |
| 124    | PE=4 SV=2                                                     | F1Q260_CANFA      | Lysosome-Associated Membrane Protein 1                         |
|        | Uncharacterized protein OS=Canis familiaris GN=GAS1 PE=4      |                   |                                                                |
| 125    | SV=1                                                          | E2R2S1_CANFA      | Growth Arrest-Specific 1                                       |
|        | Uncharacterized protein OS=Canis familiaris GN=CTSL PE=2 SV=1 |                   |                                                                |
| 126    | Cathepsin L1 OS=Canis familiaris GN=CTSL PE=2 SV=1            | CATL1_CANFA       | Cathepsin L1                                                   |
|        | Uncharacterized protein OS=Canis familiaris GN=SCRN2          |                   |                                                                |
| 127    | PE=4 SV=1                                                     | E2QTH4_CANFA      | Secernin 2                                                     |
|        | Uncharacterized protein OS=Canis familiaris GN=UNC5C          |                   |                                                                |
| 128    | PE=4 SV=2                                                     | F1PUV2_CANFA (+1) | Netrin Receptor UNC5C                                          |
|        | Uncharacterized protein (Fragment) OS=Canis familiaris        |                   |                                                                |
| 129    | GN=AEBP1 PE=4 SV=2                                            | H9GW59_CANFA      | AE Binding Protein 1                                           |
|        | Epididymal secretory protein E1 (Fragment) OS=Canis           |                   |                                                                |
| 130    | familiaris GN=NPC2 PE=4 SV=2                                  | F1PAR9_CANFA (+1) | Epididymal secretory protein E1                                |
|        | Uncharacterized protein OS=Canis familiaris GN=LAMP2          |                   |                                                                |
| 131    | PE=4 SV=2                                                     | E2RNJ1_CANFA (+1) | Lysosome-Associated Membrane Protein 2                         |
|        | Cluster of Uncharacterized protein OS=Canis familiaris        |                   |                                                                |
| 132    | GN=PLXNA3 PE=4 SV=2 (F1PWQ0_CANFA)                            | F1PWQ0_CANFA [3]  | plexin-A3                                                      |
|        | Uncharacterized protein OS=Canis familiaris GN=PLXNB2         |                   |                                                                |
| 133    | PE=4 SV=2                                                     | F1P9S5_CANFA      | Plexin B2                                                      |
|        | Uncharacterized protein OS=Canis familiaris GN=PLXDC2         |                   |                                                                |
| 134    | PE=4 SV=2                                                     | F1PNK7_CANFA      | Plexin Domain Containing 2                                     |
|        | Uncharacterized protein OS=Canis familiaris GN=EHD2 PE=4      |                   |                                                                |
| 135    | SV=2                                                          | F1PNP7_CANFA      | EH-Domain Containing 2                                         |
|        | Uncharacterized protein OS=Canis familiaris GN=AHSG           |                   |                                                                |
| 136    | PE=4 SV=2                                                     | E2QUV3_CANFA      | alpha-2-HS-glycoprotein                                        |
|        | Uncharacterized protein OS=Canis familiaris GN=CAPG           |                   |                                                                |
| 137    | PE=4 SV=2                                                     | E2R413_CANFA      | Gelsolin-Like Capping Protein                                  |
|        | Uncharacterized protein OS=Canis familiaris GN=SLC29A1        |                   |                                                                |
| 138    | Mucin OS=Canis familiaris PE=2 SV=1                           | Q28226_CANFA      | Mucin                                                          |
|        | Uncharacterized protein OS=Canis familiaris GN=SLC29A1        |                   |                                                                |
| 139    | PE=3 SV=2                                                     | E2RLS3_CANFA      | Solute Carrier Family 29 (Nucleoside Transporters), Member 1   |
|        | Uncharacterized protein OS=Canis familiaris GN=CA2 PE=4       |                   |                                                                |
| 140    | SV=2                                                          | F1PDY8_CANFA      | CA2                                                            |
|        | Uncharacterized protein OS=Canis familiaris GN=CA3 PE=4       |                   |                                                                |
| 141    | SV=2                                                          | F1PDZ7_CANFA      | Carbonic Anhydrase 3                                           |
|        | Uncharacterized protein OS=Canis familiaris GN=PLOD1          |                   |                                                                |
| 142    | PE=4 SV=2                                                     | F1P9Z8_CANFA (+1) | Procollagen-Lysine, 2-Oxoglutarate 5-Dioxygenase 1             |
|        | Uncharacterized protein (Fragment) OS=Canis familiaris        |                   |                                                                |
| 143    | GN=PAM PE=4 SV=1                                              | F1Q4G4_CANFA      | Peptidylglycine Alpha-Amidating Monooxygenase                  |
|        | Uncharacterized protein OS=Canis familiaris GN=ECHDC1         |                   |                                                                |
| 144    | PE=3 SV=2                                                     | F1PW22_CANFA      | Enoyl-CoA Hydratase Domain-Containing Protein 1                |
|        | Uncharacterized protein (Fragment) OS=Canis familiaris        |                   |                                                                |
| 145    | GN=PCSK5 PE=3 SV=2                                            | F1P9I5_CANFA (+2) | Proprotein Convertase Subtilisin/Kexin Type 5                  |
|        | Uncharacterized protein (Fragment) OS=Canis familiaris        |                   |                                                                |
| 146    | GN=CHST6 PE=4 SV=2                                            | E2RSN9_CANFA      | Carbohydrate (N-Acetylglucosamine 6-O) Sulfotransferase 6      |
|        | Uncharacterized protein OS=Canis familiaris GN=APLP2          |                   |                                                                |
| 147    | PE=4 SV=1                                                     | E2RPM5_CANFA (+1) | Amyloid Beta (A4) Precursor-Like Protein 2                     |

**Supplementary Table S1 contd.**

| <b>S. No.</b> | <b>Identified Proteins</b>                                                              | <b>Accession Number</b> | <b>Protein Name-FASTA</b>                                     |
|---------------|-----------------------------------------------------------------------------------------|-------------------------|---------------------------------------------------------------|
|               | Uncharacterized protein OS=Canis familiaris GN=GBE1 PE=4                                |                         |                                                               |
| 148           | SV=2<br>Beta-glucuronidase OS=Canis familiaris GN=GUSB PE=1                             | F1PX32_CANFA            | Glucan (1,4-Alpha-), Branching Enzyme 1                       |
| 149           | SV=1<br>Xylosyltransferase 1 (Fragment) OS=Canis familiaris                             | BGLR_CANFA (+1)         | Beta-glucuronidase                                            |
| 150           | GN=XYLT1 PE=4 SV=1<br>Uncharacterized protein OS=Canis familiaris GN=GPLD1              | F1PB62_CANFA (+1)       | Xylosyltransferase 1<br>Glycosylphosphatidylinositol Specific |
| 151           | PE=4 SV=2<br>Uncharacterized protein OS=Canis familiaris GN=SIAE PE=4                   | E2RK02_CANFA            | Phospholipase D11                                             |
| 152           | SV=2<br>Carbohydrate sulfotransferase-like protein OS=Canis                             | F1PXN3_CANFA            | Sialic Acid Acetyltransferase1                                |
| 153           | familiaris GN=CHST3 PE=4 SV=2<br>N-acetylgalactosamine-6-sulfatase (Fragment) OS=Canis  | E2RLE9_CANFA            | Carbohydrate sulfotransferase-like protein                    |
| 154           | familiaris GN=GALNS PE=4 SV=2<br>Uncharacterized protein OS=Canis familiaris GN=MLXIPL  | F1PHF0_CANFA (+1)       | N-acetylgalactosamine-6-sulfatase                             |
| 155           | PE=4 SV=1<br>Uncharacterized protein OS=Canis familiaris GN=LYZ PE=3                    | E2RAQ3_CANFA            | MLX Interacting Protein-Like                                  |
| 156           | SV=1<br>Serum albumin OS=Canis familiaris GN=ALB PE=1 SV=3                              | G1K265_CANFA (+1)       | Lysozyme                                                      |
| 157           | Uncharacterized protein OS=Canis familiaris GN=SPTBN1                                   | ALBU_CANFA              | Serum albumin                                                 |
| 158           | PE=4 SV=2<br>Histone H4 OS=Canis familiaris GN=HIST1H4L PE=3 SV=1                       | F1PXT8_CANFA (+1)       | Spectrin, Beta, Non-Erythrocytic 1                            |
| 159           | Uncharacterized protein OS=Canis familiaris GN=HPX PE=4                                 | F2Z4N2_CANFA (+3)       | Histone H4                                                    |
| 160           | SV=2<br>Uncharacterized protein OS=Canis familiaris GN=TF PE=4                          | F1PZR4_CANFA            | hemopexin                                                     |
| 161           | SV=1<br>Apolipoprotein E OS=Canis familiaris GN=APOE PE=3 SV=1                          | J9P430_CANFA            | transferrin                                                   |
| 162           | Uncharacterized protein OS=Canis familiaris GN=A2M PE=4                                 | F1PJ74_CANFA            | Apolipoprotein E                                              |
| 163           | SV=1<br>Hemoglobin subunit alpha OS=Canis familiaris GN=HBA                             | F6UME0_CANFA            | alpha-2-macroglobulin                                         |
| 164           | PE=1 SV=1<br>Protein disulfide-isomerase OS=Canis familiaris GN=PDIA3                   | HBA_CANFA (+3)          | Hemoglobin subunit alpha                                      |
| 165           | PE=3 SV=1<br>Uncharacterized protein OS=Canis familiaris GN=NPEPPS                      | E2RD86_CANFA            | Protein disulfide-isomerase                                   |
| 166           | PE=4 SV=2<br>Uncharacterized protein OS=Canis familiaris GN=PGAM4                       | F1P7M0_CANFA            | Aminopeptidase Puromycin Sensitive                            |
| 167           | PE=3 SV=2<br>Cyclic nucleotide gated channel beta 1 OS=Canis familiaris                 | E2RT65_CANFA            | Phosphoglycerate Mutase Processed Protein                     |
| 168           | GN=CNGB1 PE=2 SV=1<br>Uncharacterized protein OS=Canis familiaris GN=UBB PE=4           | S4V0G9_CANFA (+1)       | Cyclic nucleotide gated channel beta 1                        |
| 169           | SV=2<br>Cluster of Superoxide dismutase [Cu-Zn] (Fragment)                              | F1PDG4_CANFA (+3)       | Ubiquitin B1                                                  |
| 170           | OS=Canis familiaris GN=SOD1 PE=3 SV=2<br>(F1Q462_CANFA)                                 | F1Q462_CANFA [2]        | Superoxide dismutase [Cu-Zn]                                  |
| 171           | Purine nucleoside phosphorylase OS=Canis familiaris                                     | F1PQM1_CANFA            | Purine nucleoside phosphorylase                               |
| 172           | GN=PNP PE=3 SV=2<br>Uncharacterized protein (Fragment) OS=Canis familiaris              | F1PUL4_CANFA            | Phosphoglucomutase 1                                          |
| 173           | GN=PGM1 PE=3 SV=2<br>Triosephosphate isomerase OS=Canis familiaris GN=TPI1              | TPIS_CANFA              | Triosephosphate Isomerase                                     |
| 174           | PE=1 SV=3<br>Aldose 1-epimerase OS=Canis familiaris GN=GALM PE=3                        | E2QWA2_CANFA (+1)       | Aldose 1-epimerase                                            |
| 175           | SV=1<br>Proteasome subunit alpha type OS=Canis familiaris                               | E2RMN2_CANFA            | Proteasome subunit alpha                                      |
| 176           | GN=PSMA6 PE=3 SV=1<br>Fructose-bisphosphate aldolase OS=Canis familiaris                | F1PL63_CANFA (+1)       | Fructose-bisphosphate aldolase                                |
| 177           | GN=ALDOC PE=3 SV=1<br>Uncharacterized protein OS=Canis familiaris GN=PGLS PE=4          | E2RLQ6_CANFA            | 6-phosphogluconolactonase1                                    |
| 178           | SV=1<br>Uncharacterized protein (Fragment) OS=Canis familiaris                          | E2RMJ8_CANFA            | DNAH10                                                        |
| 179           | GN=DNAH10 PE=4 SV=2<br>Uncharacterized protein OS=Canis familiaris GN=BLVRB             | E2QVU9_CANFA            | Biliverdin Reductase B (Flavin Reductase (NADPH))             |
| 180           | PE=4 SV=1<br>Uncharacterized protein OS=Canis familiaris GN=GPI PE=3                    | E2R2C3_CANFA            | Glucose Phosphate Isomerase                                   |
| 181           | SV=1<br>Fructose-bisphosphate aldolase (Fragment) OS=Canis                              | F1PBT3_CANFA            | Fructose-bisphosphate aldolase                                |
| 182           | familiaris GN=ALDOA PE=3 SV=2<br>Uncharacterized protein (Fragment) OS=Canis familiaris | F1PGY1_CANFA            | HSP90AA1                                                      |
|               | GN=HSP90AA1 PE=4 SV=2                                                                   |                         |                                                               |



Supplementary Table S1 contd.

| S. No. | Identified Proteins                                         | Accession Number  | Protein Name-FASTA                         |
|--------|-------------------------------------------------------------|-------------------|--------------------------------------------|
|        | Cluster of Uncharacterized protein OS=Canis familiaris      |                   |                                            |
| 183    | GN=HSPA8 PE=3 SV=1 (E2R0T6_CANFA)                           | E2R0T6_CANFA [3]  | HSPA8                                      |
|        | Uncharacterized protein OS=Canis familiaris GN=HSPA8        |                   |                                            |
| 184    | PE=3 SV=1                                                   | E2R0T6_CANFA (+1) | HSPA8                                      |
|        | Uncharacterized protein OS=Canis familiaris GN=HSPA2        |                   |                                            |
| 185    | PE=3 SV=1                                                   | E2QX84_CANFA      | HSPA2                                      |
| 186    | Annexin OS=Canis familiaris GN=ANXA5 PE=3 SV=2              | E2RQ14_CANFA      | ANXA5                                      |
|        | Cluster of Uncharacterized protein OS=Canis familiaris      |                   |                                            |
| 187    | GN=ACTN4 PE=4 SV=1 (E2R5T9_CANFA)                           | E2R5T9_CANFA [3]  | ACTN4                                      |
|        | Uncharacterized protein OS=Canis familiaris GN=ACTN4        |                   |                                            |
| 188    | PE=4 SV=1                                                   | E2R5T9_CANFA (+1) | ACTN4                                      |
|        | Uncharacterized protein OS=Canis familiaris GN=ACTN1        |                   |                                            |
| 189    | PE=4 SV=2                                                   | E2QY08_CANFA      | ACTN1                                      |
| 190    | Annexin A2 OS=Canis familiaris GN=ANXA2 PE=1 SV=1           | ANXA2_CANFA       | ANXA2                                      |
| 191    | Annexin OS=Canis familiaris GN=ANXA4 PE=3 SV=2              | F1PXG4_CANFA      | ANXA4                                      |
| 192    | Annexin OS=Canis familiaris GN=ANXA8L1 PE=3 SV=2            | E2R0S6_CANFA      | Annexin                                    |
|        | Glyceraldehyde-3-phosphate dehydrogenase (Fragment)         |                   |                                            |
| 193    | OS=Canis familiaris GN=GAPDH PE=3 SV=2                      | F1PTZ9_CANFA      | Glyceraldehyde-3-phosphate dehydrogenase   |
|        | Uncharacterized protein OS=Canis familiaris GN=LAMB2        |                   |                                            |
| 194    | PE=4 SV=1                                                   | E2R4J1_CANFA      | Laminin, Beta 2                            |
|        | Uncharacterized protein OS=Canis familiaris GN=LAMC1        |                   |                                            |
| 195    | PE=4 SV=2                                                   | F1PHK9_CANFA      | Laminin B2 Chain                           |
|        | Uncharacterized protein OS=Canis familiaris GN=LAMA4        |                   |                                            |
| 196    | PE=4 SV=2                                                   | F1PR66_CANFA      | Laminin, Alpha 4                           |
|        | L-lactate dehydrogenase OS=Canis familiaris GN=LDHA         |                   |                                            |
| 197    | PE=3 SV=2                                                   | F1PVW0_CANFA      | LDHA                                       |
|        | Uncharacterized protein (Fragment) OS=Canis familiaris      |                   |                                            |
| 198    | GN=MFI2 PE=4 SV=2                                           | F1P7Y8_CANFA      | melanotransferrin                          |
|        | Superoxide dismutase [Cu-Zn] OS=Canis familiaris            |                   |                                            |
| 199    | GN=SOD3 PE=3 SV=2                                           | F1PAS8_CANFA      | Superoxide dismutase [Cu-Zn]               |
|        | Uncharacterized protein OS=Canis familiaris GN=CP PE=4      |                   |                                            |
| 200    | SV=2                                                        | F1PAX2_CANFA      | Ceruloplasmin (Ferroxidase)                |
|        | Cluster of Uncharacterized protein OS=Canis familiaris      |                   |                                            |
| 201    | GN=YWHAZ PE=3 SV=2 (F1PBL1_CANFA)                           | F1PBL1_CANFA [6]  | YWHAZ                                      |
|        | Amyloid beta A4 protein OS=Canis familiaris GN=APP PE=4     |                   |                                            |
| 202    | SV=2                                                        | F1P603_CANFA (+5) | Amyloid beta A4 protein                    |
|        | Uncharacterized protein OS=Canis familiaris GN=YWHAZ        |                   |                                            |
| 203    | PE=3 SV=2                                                   | F1PBL1_CANFA      | YWHAZ                                      |
|        | Uncharacterized protein OS=Canis familiaris GN=YWHAB        |                   |                                            |
| 204    | PE=3 SV=2                                                   | F1PKW7_CANFA      | YWHAB                                      |
|        | Uncharacterized protein (Fragment) OS=Canis familiaris      |                   |                                            |
| 205    | GN=YWHAG PE=3 SV=1                                          | J9NRH5_CANFA      | YWHAG                                      |
|        | Uncharacterized protein OS=Canis familiaris GN=YWHAH        |                   |                                            |
| 206    | PE=3 SV=1                                                   | J9P6N4_CANFA      | YWHAH                                      |
|        | Uncharacterized protein OS=Canis familiaris GN=YWHAG        |                   |                                            |
| 207    | PE=4 SV=1                                                   | E2QVP6_CANFA      | YWHAG                                      |
|        | Cluster of Actin, cytoplasmic 1 OS=Canis familiaris GN=ACTB |                   |                                            |
| 208    | PE=2 SV=3 (ACTB_CANFA)                                      | ACTB_CANFA [2]    | ACTB                                       |
|        | Actin, cytoplasmic 1 OS=Canis familiaris GN=ACTB PE=2       |                   |                                            |
| 209    | SV=3                                                        | ACTB_CANFA        | ACTB                                       |
|        | Uncharacterized protein OS=Canis familiaris GN=ACTG1        |                   |                                            |
| 210    | PE=3 SV=2                                                   | F1PQL8_CANFA      | ACTG1                                      |
|        | Uncharacterized protein (Fragment) OS=Canis familiaris      |                   |                                            |
| 211    | GN=TUBA1C PE=3 SV=2                                         | E2RNQ2_CANFA (+1) | Tubulin, Alpha 1c                          |
|        | Uncharacterized protein OS=Canis familiaris GN=LTF PE=4     |                   |                                            |
| 212    | SV=1                                                        | F1PR54_CANFA      | lactotransferrin                           |
|        | Phosphatidylethanolamine-binding protein 1 OS=Canis         |                   |                                            |
| 213    | familiaris GN=PEBP1 PE=1 SV=1                               | PEBP1_CANFA       | Phosphatidylethanolamine-binding protein 1 |
| 214    | Alpha 1 antitrypsin OS=Canis familiaris PE=2 SV=1           | A1ILJ0_CANFA (+1) | Alpha 1 antitrypsin                        |
|        | Uncharacterized protein OS=Canis familiaris GN=MRC2         |                   |                                            |
| 215    | PE=4 SV=2                                                   | F1PCR2_CANFA (+1) | Mannose Receptor, C Type 2                 |
| 216    | Malic enzyme OS=Canis familiaris GN=ME1 PE=3 SV=1           | J9NZX7_CANFA      | Malic enzyme                               |
|        | Uncharacterized protein OS=Canis familiaris GN=PRDX2        |                   |                                            |
| 217    | PE=4 SV=2                                                   | F1PCG4_CANFA      | PRDX2                                      |
|        | Cluster of Uncharacterized protein OS=Canis familiaris      |                   |                                            |
| 218    | GN=GSTM4 PE=3 SV=2 (F1P6R7_CANFA)                           | F1P6R7_CANFA [3]  | GSTM4                                      |

Supplementary Table S1 contd.

| S. No. | Identified Proteins                                                                                            | Accession Number  | Protein Name-FASTA                                              |
|--------|----------------------------------------------------------------------------------------------------------------|-------------------|-----------------------------------------------------------------|
| 219    | Uncharacterized protein OS=Canis familiaris GN=GSTM4<br>PE=3 SV=2                                              | F1P6R7_CANFA (+1) | GSTM4                                                           |
| 220    | Uncharacterized protein OS=Canis familiaris GN=GSTM3<br>PE=3 SV=1                                              | E2R5B9_CANFA      | GSTM3                                                           |
| 221    | Uncharacterized protein OS=Canis familiaris GN=DPYSL2<br>PE=4 SV=2                                             | F1P9U4_CANFA      | Dihydropyrimidinase-Like 2                                      |
| 222    | Uncharacterized protein OS=Canis familiaris GN=PRDX1<br>PE=4 SV=1                                              | E2RHG2_CANFA      | PRDX1                                                           |
| 223    | Uncharacterized protein OS=Canis familiaris GN=HSPA5<br>PE=3 SV=2                                              | F1PIC7_CANFA      | HSPA5                                                           |
| 224    | Annexin OS=Canis familiaris GN=ANXA1 PE=3 SV=1                                                                 | F1P6B7_CANFA      | Annexin                                                         |
| 225    | L-lactate dehydrogenase OS=Canis familiaris GN=LDHB<br>PE=3 SV=1                                               | E2R761_CANFA (+1) | L-lactate dehydrogenase                                         |
| 226    | Phosphoglycerate kinase OS=Canis familiaris GN=PGK1<br>PE=3 SV=1                                               | E2RRC9_CANFA      | PGK1                                                            |
| 227    | Malate dehydrogenase (Fragment) OS=Canis familiaris<br>GN=MDH1 PE=3 SV=2                                       | E2QV08_CANFA (+1) | Malate dehydrogenase                                            |
| 228    | Pyruvate kinase OS=Canis familiaris GN=PKM PE=3 SV=2                                                           | F1PHR2_CANFA      | Pyruvate kinase                                                 |
| 229    | Uncharacterized protein OS=Canis familiaris GN=CALM1<br>PE=4 SV=1                                              | E2REK6_CANFA      | CALM1                                                           |
| 230    | Cluster of Uncharacterized protein OS=Canis familiaris<br>GN=VIM PE=3 SV=1 (F1PLS4_CANFA)                      | F1PLS4_CANFA [17] | Vimentin                                                        |
| 231    | Cluster of Uncharacterized protein OS=Canis familiaris<br>GN=EZR PE=4 SV=1 (E2RSI6_CANFA)                      | E2RSI6_CANFA      | Ezrin                                                           |
| 232    | Uncharacterized protein OS=Canis familiaris GN=PLEC PE=4<br>SV=2                                               | F1PHS5_CANFA      | plectin                                                         |
| 233    | Uncharacterized protein (Fragment) OS=Canis familiaris<br>GN=GALNT2 PE=3 SV=2                                  | F1P835_CANFA (+1) | Polypeptide N-Acetylgalactosaminyltransferase 2                 |
| 234    | Cluster of Nucleoside diphosphate kinase (Fragment)<br>OS=Canis familiaris GN=NME2 PE=3 SV=2<br>(E2RC20_CANFA) | E2RC20_CANFA [3]  | Nucleoside diphosphate kinase                                   |
| 235    | Uncharacterized protein (Fragment) OS=Canis familiaris<br>GN=HSP70 PE=3 SV=1                                   | G1K268_CANFA (+1) | HSP70                                                           |
| 236    | Annexin OS=Canis familiaris GN=ANXA11 PE=3 SV=1                                                                | E2QXN8_CANFA      | Annexin                                                         |
| 237    | Ribonuclease A B1 OS=Canis familiaris GN=RNASE4 PE=3<br>SV=2                                                   | F1PPZ2_CANFA      | Ribonuclease A B1                                               |
| 238    | Uncharacterized protein OS=Canis familiaris GN=GSTP1<br>PE=3 SV=2                                              | F1Q0J0_CANFA      | GSTP1                                                           |
| 239    | Uncharacterized protein (Fragment) OS=Canis familiaris<br>GN=UGP2 PE=4 SV=2                                    | E2R5R9_CANFA (+1) | Uridyl Diphosphate Glucose Pyrophosphorylase 2                  |
| 240    | Uncharacterized protein (Fragment) OS=Canis familiaris<br>GN=PRDX6 PE=4 SV=1                                   | F1PC59_CANFA      | PRDX6                                                           |
| 241    | Anionic trypsinogen (Fragment) OS=Canis familiaris PE=3<br>SV=1                                                | A0FGS8_CANFA (+1) | Anionic trypsinogen                                             |
| 242    | Transaldolase OS=Canis familiaris GN=LOC100855463 PE=3<br>SV=1                                                 | H9GW87_CANFA      | Transaldolase                                                   |
| 243    | Elongation factor 1-alpha OS=Canis familiaris PE=3 SV=1                                                        | J9NU04_CANFA      | Elongation factor 1-alpha                                       |
| 244    | Uncharacterized protein OS=Canis familiaris GN=LECT1<br>PE=4 SV=2                                              | F1PB82_CANFA      | Leukocyte Cell Derived Chemotaxin 1                             |
| 245    | Uncharacterized protein OS=Canis familiaris GN=AKR1A1<br>PE=4 SV=2                                             | F1PK43_CANFA      | Aldo-Keto Reductase Family 1, Member A1<br>(Aldehyde Reductase) |
| 246    | Uncharacterized protein OS=Canis familiaris GN=SMPDL3A<br>PE=4 SV=2                                            | E2RRU2_CANFA (+1) | Sphingomyelin Phosphodiesterase, Acid-Like 3A                   |
| 247    | Uncharacterized protein OS=Canis familiaris GN=LMNA<br>PE=3 SV=1                                               | F1PBJ3_CANFA (+1) | Lamin A/C                                                       |
| 248    | Peptidyl-prolyl cis-trans isomerase OS=Canis familiaris<br>GN=LOC100688474 PE=3 SV=1                           | F1PK62_CANFA (+1) | Peptidyl-prolyl cis-trans isomerase                             |
| 249    | Uncharacterized protein OS=Canis familiaris GN=ENO2 PE=3<br>SV=2                                               | E2RAS8_CANFA      | Enolase 2                                                       |
| 250    | Uncharacterized protein OS=Canis familiaris GN=TKT PE=4<br>SV=2                                                | F1PE28_CANFA      | transketolase                                                   |
| 251    | Creatine kinase B-type OS=Canis familiaris GN=CKB PE=1<br>SV=1                                                 | KCRB_CANFA        | Creatine kinase B                                               |
| 252    | Uncharacterized protein (Fragment) OS=Canis familiaris<br>GN=ARSA PE=4 SV=1                                    | F6PKZ1_CANFA (+1) | Arylsulfatase A                                                 |
| 253    | Haptoglobin OS=Canis familiaris GN=HP PE=3 SV=1                                                                | G1K2D9_CANFA (+1) | Haptoglobin                                                     |
| 254    | Uncharacterized protein OS=Canis familiaris GN=ATP6V1A<br>PE=3 SV=1                                            | E2QYG6_CANFA      | ATPase, H+ Transporting, Lysosomal 70kDa, V1<br>Subunit A       |

Supplementary Table 1 contd.

| S. No. | Identified Proteins                                                                                    | Accession Number  | Protein Name-FASTA                                                                                          |
|--------|--------------------------------------------------------------------------------------------------------|-------------------|-------------------------------------------------------------------------------------------------------------|
|        | Uncharacterized protein OS=Canis familiaris GN=ARHGDI4                                                 |                   |                                                                                                             |
| 255    | PE=4 SV=2<br>Proteasome subunit beta type OS=Canis familiaris                                          | F1PL93_CANFA      | Rho GDP Dissociation Inhibitor (GDI) Alpha                                                                  |
| 256    | GN=PSMB6 PE=3 SV=1<br>Uncharacterized protein (Fragment) OS=Canis familiaris                           | E2R0B6_CANFA      | Proteasome subunit beta<br>Inter-Alpha-Trypsin Inhibitor Heavy Chain Family,<br>Member 5                    |
| 257    | GN=ITIH5 PE=4 SV=2<br>Uncharacterized protein OS=Canis familiaris GN=IMPA1                             | F1PDN8_CANFA (+1) |                                                                                                             |
| 258    | PE=4 SV=1<br>Uncharacterized protein (Fragment) OS=Canis familiaris                                    | J9P7W8_CANFA      | Inositol(Myo)-1(Or 4)-Monophosphatase 1<br>Serpine Peptidase Inhibitor, Clade G (C1 Inhibitor),<br>Member 1 |
| 259    | GN=SERPING1 PE=3 SV=2                                                                                  | F1PYX9_CANFA      | Ectonucleotide<br>Pyrophosphatase/Phosphodiesterase Family<br>Member 2, Extracellular Lysophospholipase D   |
|        | Uncharacterized protein OS=Canis familiaris GN=ENPP2                                                   |                   |                                                                                                             |
| 260    | PE=4 SV=1                                                                                              | F6UVK4_CANFA      |                                                                                                             |
|        | Uncharacterized protein OS=Canis familiaris GN=SERPINA3                                                |                   |                                                                                                             |
| 261    | PE=3 SV=2                                                                                              | F1PH86_CANFA (+1) | Serine (Or Cysteine) Proteinase Inhibitor, Clade A<br>(Alpha-1 Antitrypsin, Antitrypsin), Member 31         |
|        | Uncharacterized protein OS=Canis familiaris GN=SERPINE2                                                |                   |                                                                                                             |
| 262    | PE=3 SV=1                                                                                              | F6Y2H4_CANFA      | Serine (Or Cysteine) Proteinase Inhibitor, Clade E<br>(Nexin)                                               |
|        | Uncharacterized protein OS=Canis familiaris GN=SLC44A1                                                 |                   |                                                                                                             |
| 263    | PE=4 SV=2                                                                                              | E2R949_CANFA      | Solute Carrier Family 44 (Choline Transporter),<br>Member 1                                                 |
|        | Uncharacterized protein OS=Canis familiaris GN=ABHD14B                                                 |                   |                                                                                                             |
| 264    | PE=4 SV=1                                                                                              | E2RLZ9_CANFA      | Abhydrolase Domain Containing 14B                                                                           |
|        | Uncharacterized protein OS=Canis familiaris GN=PEPD PE=3<br>SV=2                                       |                   |                                                                                                             |
| 265    |                                                                                                        | F1PNS6_CANFA      | Peptidase D                                                                                                 |
|        | Keratin, type II cytoskeletal 2 epidermal OS=Canis<br>familiaris GN=KRT2 PE=3 SV=2                     |                   |                                                                                                             |
| 266    |                                                                                                        | F1PTX4_CANFA (+1) | Keratin, type II cytoskeletal 2                                                                             |
|        | Uncharacterized protein OS=Canis familiaris GN=KRT72                                                   |                   |                                                                                                             |
| 267    | PE=3 SV=2                                                                                              | E2QUT7_CANFA      | KRT72                                                                                                       |
|        | Uncharacterized protein OS=Canis familiaris GN=KRT8                                                    |                   |                                                                                                             |
| 268    | PE=3 SV=2                                                                                              | F1PW98_CANFA      | KRT8                                                                                                        |
|        | Keratin, type II cytoskeletal 1 OS=Canis familiaris<br>GN=KRT1 PE=3 SV=1                               |                   |                                                                                                             |
| 269    |                                                                                                        | F1PTY1_CANFA (+1) | KRT1                                                                                                        |
|        | Uncharacterized protein (Fragment) OS=Canis familiaris<br>GN=KRT5 PE=3 SV=1                            |                   |                                                                                                             |
| 270    |                                                                                                        | L7N095_CANFA      | KRT5                                                                                                        |
|        | Uncharacterized protein OS=Canis familiaris GN=KRT3                                                    |                   |                                                                                                             |
| 271    | PE=3 SV=1                                                                                              | L7N094_CANFA      | KRT3                                                                                                        |
|        | Uncharacterized protein OS=Canis familiaris GN=KRT5                                                    |                   |                                                                                                             |
| 272    | PE=3 SV=2                                                                                              | E2R8Z5_CANFA      | KRT5                                                                                                        |
|        | Uncharacterized protein OS=Canis familiaris GN=KRT74                                                   |                   |                                                                                                             |
| 273    | PE=3 SV=1                                                                                              | L7N0P4_CANFA      | KRT74                                                                                                       |
|        | Uncharacterized protein (Fragment) OS=Canis familiaris<br>GN=KRT7 PE=3 SV=2                            |                   |                                                                                                             |
| 274    |                                                                                                        | F1PRB0_CANFA      | KRT7                                                                                                        |
|        | Cluster of Uncharacterized protein OS=Canis familiaris<br>GN=KRT19 PE=3 SV=1 (F1Q0N9_CANFA)            |                   |                                                                                                             |
| 275    |                                                                                                        | F1Q0N9_CANFA [6]  | KRT19                                                                                                       |
|        | Uncharacterized protein OS=Canis familiaris GN=KRT19                                                   |                   |                                                                                                             |
| 276    | PE=3 SV=1                                                                                              | F1Q0N9_CANFA      | KRT19                                                                                                       |
|        | Keratin, type I cytoskeletal 10 OS=Canis familiaris<br>GN=KRT10 PE=3 SV=2                              |                   |                                                                                                             |
| 277    |                                                                                                        | F1PYU9_CANFA (+1) | KRT10                                                                                                       |
|        | Uncharacterized protein OS=Canis familiaris GN=KRT42                                                   |                   |                                                                                                             |
| 278    | PE=3 SV=1                                                                                              | E2R7W6_CANFA      | KRT42                                                                                                       |
|        | Uncharacterized protein OS=Canis familiaris GN=KRT14                                                   |                   |                                                                                                             |
| 279    | PE=3 SV=2                                                                                              | F1Q0R0_CANFA      | KRT14                                                                                                       |
|        | Uncharacterized protein OS=Canis familiaris GN=KRT17                                                   |                   |                                                                                                             |
| 280    | PE=3 SV=2                                                                                              | F1Q0Q9_CANFA      | KRT17                                                                                                       |
|        | Cluster of Uncharacterized protein (Fragment) OS=Canis<br>familiaris GN=KRT18 PE=3 SV=2 (E2REU6_CANFA) |                   |                                                                                                             |
| 281    |                                                                                                        | E2REU6_CANFA [2]  | KRT18                                                                                                       |
|        | Uncharacterized protein (Fragment) OS=Canis familiaris<br>GN=KRT18 PE=3 SV=2                           |                   |                                                                                                             |
| 282    |                                                                                                        | E2REU6_CANFA      | KRT18                                                                                                       |
|        | Uncharacterized protein OS=Canis familiaris GN=KRT32                                                   |                   |                                                                                                             |
| 283    | PE=3 SV=1                                                                                              | L7N0G9_CANFA      | KRT32                                                                                                       |
|        | Keratin, type I cytoskeletal 9 OS=Canis familiaris GN=KRT9<br>PE=4 SV=1                                |                   |                                                                                                             |
| 284    |                                                                                                        | F1Q0N7_CANFA (+3) | KRT9                                                                                                        |
|        | Uncharacterized protein OS=Canis familiaris GN=KRT82                                                   |                   |                                                                                                             |
| 285    | PE=3 SV=1                                                                                              | E2R831_CANFA      | KRT82                                                                                                       |
|        | Uncharacterized protein (Fragment) OS=Canis familiaris<br>PE=4 SV=2                                    |                   |                                                                                                             |
| 286    |                                                                                                        | F1PQI2_CANFA      |                                                                                                             |
|        | Uncharacterized protein OS=Canis familiaris PE=4 SV=2                                                  |                   |                                                                                                             |
| 287    |                                                                                                        | F1PCM6_CANFA      |                                                                                                             |
|        | Uncharacterized protein OS=Canis familiaris<br>GN=LOC100856711 PE=4 SV=1                               |                   |                                                                                                             |
| 288    |                                                                                                        | J9P1I7_CANFA (+1) | LOC100856711                                                                                                |

**Supplementary Table S1 contd.**

| <b>S. No.</b> | <b>Identified Proteins</b>                                                                      | <b>Accession Number</b> | <b>Protein Name-FASTA</b> |
|---------------|-------------------------------------------------------------------------------------------------|-------------------------|---------------------------|
| 289           | Uncharacterized protein OS=Canis familiaris PE=3 SV=1                                           | J9NTU0_CANFA            |                           |
| 290           | Uncharacterized protein OS=Canis familiaris PE=3 SV=2                                           | F1PCH3_CANFA            |                           |
| 291           | Uncharacterized protein OS=Canis familiaris PE=4 SV=1                                           | F6Y478_CANFA            |                           |
| 292           | Cluster of Uncharacterized protein OS=Canis familiaris PE=4 SV=2 (E2RCC8_CANFA)                 | E2RCC8_CANFA            |                           |
| 293           | Uncharacterized protein OS=Canis familiaris PE=4 SV=2                                           | E2RCC8_CANFA            |                           |
| 294           | Uncharacterized protein (Fragment) OS=Canis familiaris PE=3 SV=1                                | J9P219_CANFA            |                           |
| 295           | Uncharacterized protein OS=Canis familiaris PE=4 SV=1                                           | J9P9V0_CANFA            |                           |
| 296           | Cluster of Uncharacterized protein OS=Canis familiaris GN=LOC100687814 PE=3 SV=1 (J9NW97_CANFA) | J9NW97_CANFA [4]        | LOC100687814              |
| 297           | Uncharacterized protein OS=Canis familiaris GN=LOC100687814 PE=3 SV=1                           | J9NW97_CANFA            | LOC100687814              |
| 298           | Uncharacterized protein OS=Canis familiaris GN=LOC100856491 PE=4 SV=1                           | J9P889_CANFA            | LOC100856491              |
| 299           | Uncharacterized protein OS=Canis familiaris GN=LOC612122 PE=4 SV=2                              | H9GWR0_CANFA (+4)       | LOC612122                 |
| 300           | Uncharacterized protein OS=Canis familiaris GN=LOC609095 PE=3 SV=1                              | E2RQN4_CANFA            | LOC609095                 |
| 301           | Uncharacterized protein (Fragment) OS=Canis familiaris GN=LOC609010 PE=4 SV=1                   | J9P0V2_CANFA            | LOC609010                 |
| 302           | Uncharacterized protein (Fragment) OS=Canis familiaris GN=LOC609402 PE=3 SV=2                   | E2RLH6_CANFA (+1)       | LOC609402                 |
| 303           | Uncharacterized protein (Fragment) OS=Canis familiaris GN=LOC100856547 PE=4 SV=2                | H9GWE7_CANFA (+2)       | LOC100856547              |
